# Supplementary material for: YAP1/TAZ Mediates Rumen Epithelial Cell Proliferation but Not Short-Chain Fatty Acid Metabolism In Vitro
Source: Animals (Basel). 2024 Mar 17;14(6):922. doi: 10.3390/ani14060922 (PMC10967441; doi:10.3390/ani14060922)
Supplement: Supplementary file 1 [file animals-14-00922-s001.zip › supplement_tables1.xlsx]

## Sheet: Table S1
Table S1. Information of the primers used for gene expression validation.
Target genes	Primer sequence, from 5' to 3'	Source	Product size (bp)
LATS1	F: CTTGGATACCACAGCCCGTT	NM_001306113.1	130
	R: TGGTGTAGCAGATGCTTGGG
LATS2	F: GCTCCCCTTTGCTAACGAGT	XM_015098193.2	200
	R: GAACGATCTGCTCCTTGCCT
MOB1A	F: GCACTGAAGCAAGCTGTCCA	XM_004006087.4	374
	R: AGGTGCCAACTCACGCCTAT
YAP1	F: GAGATCCCTGACGATGTGCC	XM_015100723.2	313
	R: TCATGGCAAAACGAGGGTCA
TEAD1	F: CAGTCACCTGCTCCACCAAA	XM_027979380.1	437
	R: CCCCTGCATGGTGAGGTTTA
TEAD3	F: GGACATCAAGCCCTTTGCAC	XM_027958367.1	344
	R: GGGGCCCTTTCTCATAGAGC
TEAD4	F: CGTCCCACGATGTGAAACCT	XM_027967998.1	354
	R: TGGAGGGTCCACGTTCAAAG
GAPDH	F: GGGTCATCATCTCTGCACCT	[24]	176
	R: GGTCATAAGTCCCTCCACGA
[1]

## Sheet: Table S2
Table S2. Sequence quality of transcriptomic data generated from Expriment 1 and 2.
Experiment	Treatment group	Sample_ID	Raw_reads	Raw_bases (G)	Clean_reads	Clean_bases (G)	Error_rate (%)	Q201 (%)	Q302 (%)	GC_pct3 (%)
1	Con	C_1	44983098	6.75	43231760	6.48	0.02	98.33	95.22	54.87
1	Con	C_2	44640828	6.7	42620026	6.39	0.02	98.17	94.81	54.54
1	Con	C_3	42877408	6.43	40590196	6.09	0.02	98.25	94.97	53.83
1	GA	G_1	43771390	6.57	41842270	6.28	0.02	98.2	94.82	53.83
1	GA	G_2	44780454	6.72	42851878	6.43	0.02	98.16	94.82	55.05
1	GA	G_3	44684560	6.7	42745870	6.41	0.03	97.88	94.09	55.22
1	VP	V_1	43558170	6.53	41635980	6.25	0.02	97.98	94.36	55.88
1	VP	V_2	42023546	6.3	40128012	6.02	0.03	97.91	94.2	55.71
1	VP	V_3	45323210	6.8	43163488	6.47	0.02	98.19	94.88	55.02
2	Con	Con_1	47833412	7.18	45309736	6.8	0.03	96.59	91.17	55.06
2	Con	Con_2	50631730	7.59	46860324	7.03	0.03	96.47	90.82	54.17
2	Con	Con_3	48301434	7.25	46179546	6.93	0.03	95.57	88.96	54.26
2	SB	SB_1	47906638	7.19	46348360	6.95	0.03	96.51	90.94	55.91
2	SB	SB_2	50939840	7.64	49353428	7.4	0.03	96.38	90.65	55.73
2	SB	SB_3	51367112	7.71	49873312	7.48	0.03	96.51	90.84	55.57
1Q20: the percentage of bases with Phred >20.
2Q30: the percentage of bases with Phred >30.
3GC_pct: the percentage of G and C in clean reads.

## Sheet: Table S3
Table S3. GO terms enriched by upregulated genes induced by GA-017 when compared to Con group.
GO_term	Description	GeneRatio	P_value	Gene_name	Count
GO:0048523	negative regulation of cellular process	10/45	0.027154	ANKRD1/TIMP3/SLC1A1/GADD45B/ADRB2/PIM1/DKK2/IL6/YOD1/RGS7BP	10
GO:0070887	cellular response to chemical stimulus	9/45	0.00393112	ANKRD1/TIMP3/SLC1A1/FOS/ADRB2/TNFSF18/IL6/YOD1/THPO	9
GO:0010033	response to organic substance	9/45	0.00413768	ANKRD1/TIMP3/SLC1A1/FOS/ADRB2/TNFSF18/IL6/YOD1/THPO	9
GO:0023051	regulation of signaling	9/45	0.0124757	ANKRD1/TIMP3/SLC1A1/GADD45B/ADRB2/DKK2/IL6/RGS7BP/THPO	9
GO:0010646	regulation of cell communication	9/45	0.0129798	ANKRD1/TIMP3/SLC1A1/GADD45B/ADRB2/DKK2/IL6/RGS7BP/THPO	9
GO:0042221	response to chemical	9/45	0.0253465	ANKRD1/TIMP3/SLC1A1/FOS/ADRB2/TNFSF18/IL6/YOD1/THPO	9
GO:0048583	regulation of response to stimulus	9/45	0.0498332	ANKRD1/TIMP3/CLDN1/GADD45B/ADRB2/DKK2/IL6/RGS7BP/THPO	9
GO:0071310	cellular response to organic substance	8/45	0.00187962	ANKRD1/TIMP3/SLC1A1/ADRB2/TNFSF18/IL6/YOD1/THPO	8
GO:0007166	cell surface receptor signaling pathway	8/45	0.0200139	TIMP3/SLC1A1/FOS/ADRB2/TNFSF18/DKK2/IL6/THPO	8
GO:0009966	regulation of signal transduction	8/45	0.0212092	ANKRD1/TIMP3/GADD45B/ADRB2/DKK2/IL6/RGS7BP/THPO	8
GO:0016310	phosphorylation	8/45	0.0241973	SLC1A1/ENO3/GADD45B/ADRB2/PIM1/TNFSF18/CDKN1C/IL6	8
GO:0035556	intracellular signal transduction	8/45	0.0343762	ANKRD1/TIMP3/FOS/GADD45B/PLD1/ADRB2/IL6/THPO	8
GO:0010647	positive regulation of cell communication	7/45	0.00205866	ANKRD1/TIMP3/SLC1A1/GADD45B/ADRB2/IL6/THPO	7
GO:0023056	positive regulation of signaling	7/45	0.00205866	ANKRD1/TIMP3/SLC1A1/GADD45B/ADRB2/IL6/THPO	7
GO:0048584	positive regulation of response to stimulus	7/45	0.0186588	ANKRD1/TIMP3/CLDN1/GADD45B/ADRB2/IL6/THPO	7
GO:0048513	animal organ development	7/45	0.0313047	ANKRD1/SLC1A1/CLDN1/FOS/ADRB2/IL6/THPO	7
GO:0009967	positive regulation of signal transduction	6/45	0.00621289	ANKRD1/TIMP3/GADD45B/ADRB2/IL6/THPO	6
GO:0042981	regulation of apoptotic process	6/45	0.00738422	ANKRD1/TIMP3/SLC1A1/GADD45B/PIM1/IL6	6
GO:0043067	regulation of programmed cell death	6/45	0.00843125	ANKRD1/TIMP3/SLC1A1/GADD45B/PIM1/IL6	6
GO:0010941	regulation of cell death	6/45	0.0108418	ANKRD1/TIMP3/SLC1A1/GADD45B/PIM1/IL6	6
GO:1902531	regulation of intracellular signal transduction	6/45	0.0184774	ANKRD1/TIMP3/GADD45B/ADRB2/IL6/THPO	6
GO:0051049	regulation of transport	6/45	0.0204647	ANKRD1/SLC1A1/ADRB2/IL6/YOD1/CLDN10	6
GO:0006915	apoptotic process	6/45	0.0285701	ANKRD1/TIMP3/SLC1A1/GADD45B/PIM1/IL6	6
GO:0012501	programmed cell death	6/45	0.0340512	ANKRD1/TIMP3/SLC1A1/GADD45B/PIM1/IL6	6
GO:0032879	regulation of localization	6/45	0.0370346	ANKRD1/SLC1A1/ADRB2/IL6/YOD1/CLDN10	6
GO:0008219	cell death	6/45	0.044357	ANKRD1/TIMP3/SLC1A1/GADD45B/PIM1/IL6	6
GO:0006468	protein phosphorylation	6/45	0.0487975	SLC1A1/GADD45B/ADRB2/PIM1/TNFSF18/IL6	6
GO:0043408	regulation of MAPK cascade	5/45	0.000599183	TIMP3/GADD45B/ADRB2/IL6/THPO	5
GO:0000165	MAPK cascade	5/45	0.000820588	TIMP3/GADD45B/ADRB2/IL6/THPO	5
GO:0071345	cellular response to cytokine stimulus	5/45	0.00209325	ANKRD1/SLC1A1/TNFSF18/IL6/THPO	5
GO:0034097	response to cytokine	5/45	0.00362925	ANKRD1/SLC1A1/TNFSF18/IL6/THPO	5
GO:1902533	positive regulation of intracellular signal transduction	5/45	0.00638738	ANKRD1/GADD45B/ADRB2/IL6/THPO	5
GO:0001932	regulation of protein phosphorylation	5/45	0.00725955	SLC1A1/GADD45B/ADRB2/TNFSF18/IL6	5
GO:0042325	regulation of phosphorylation	5/45	0.0115896	SLC1A1/GADD45B/ADRB2/TNFSF18/IL6	5
GO:1901701	cellular response to oxygen-containing compound	5/45	0.0158168	ANKRD1/SLC1A1/FOS/ADRB2/IL6	5
GO:0019220	regulation of phosphate metabolic process	5/45	0.0191487	SLC1A1/GADD45B/ADRB2/TNFSF18/IL6	5
GO:0051174	regulation of phosphorus metabolic process	5/45	0.0191487	SLC1A1/GADD45B/ADRB2/TNFSF18/IL6	5
GO:0031399	regulation of protein modification process	5/45	0.0264061	SLC1A1/GADD45B/ADRB2/TNFSF18/IL6	5
GO:0006357	regulation of transcription by RNA polymerase II	5/45	0.0361286	ANKRD1/FOS/ADRB2/ATF3/IL6	5
GO:0009719	response to endogenous stimulus	5/45	0.0407612	ANKRD1/SLC1A1/FOS/ADRB2/IL6	5
GO:1901700	response to oxygen-containing compound	5/45	0.0467835	ANKRD1/SLC1A1/FOS/ADRB2/IL6	5
GO:0019221	cytokine-mediated signaling pathway	4/45	0.00162501	SLC1A1/TNFSF18/IL6/THPO	4
GO:0051223	regulation of protein transport	4/45	0.00193565	ANKRD1/SLC1A1/IL6/YOD1	4
GO:0043065	positive regulation of apoptotic process	4/45	0.00228529	ANKRD1/TIMP3/GADD45B/IL6	4
GO:0043410	positive regulation of MAPK cascade	4/45	0.00228529	GADD45B/ADRB2/IL6/THPO	4
GO:0070201	regulation of establishment of protein localization	4/45	0.00247549	ANKRD1/SLC1A1/IL6/YOD1	4
GO:0043068	positive regulation of programmed cell death	4/45	0.00267634	ANKRD1/TIMP3/GADD45B/IL6	4
GO:0010942	positive regulation of cell death	4/45	0.00359205	ANKRD1/TIMP3/GADD45B/IL6	4
GO:0032880	regulation of protein localization	4/45	0.00984705	ANKRD1/SLC1A1/IL6/YOD1	4
GO:0001934	positive regulation of protein phosphorylation	4/45	0.0103507	SLC1A1/ADRB2/TNFSF18/IL6	4
GO:0042327	positive regulation of phosphorylation	4/45	0.0114077	SLC1A1/ADRB2/TNFSF18/IL6	4
GO:0060341	regulation of cellular localization	4/45	0.0149902	ANKRD1/SLC1A1/IL6/YOD1	4
GO:0010562	positive regulation of phosphorus metabolic process	4/45	0.0170215	SLC1A1/ADRB2/TNFSF18/IL6	4
GO:0045937	positive regulation of phosphate metabolic process	4/45	0.0170215	SLC1A1/ADRB2/TNFSF18/IL6	4
GO:0031401	positive regulation of protein modification process	4/45	0.0207773	SLC1A1/ADRB2/TNFSF18/IL6	4
GO:0009628	response to abiotic stimulus	4/45	0.0418862	ANKRD1/SLC1A1/FOS/ADRB2	4
GO:0097696	receptor signaling pathway via STAT	3/45	0.00174214	TNFSF18/IL6/THPO	3
GO:0009410	response to xenobiotic stimulus	3/45	0.00201499	ANKRD1/SLC1A1/FOS	3
GO:0030198	extracellular matrix organization	3/45	0.00298794	ADAMTSL1/IL6/ADAMTS6	3
GO:0043062	extracellular structure organization	3/45	0.00298794	ADAMTSL1/IL6/ADAMTS6	3
GO:0045229	external encapsulating structure organization	3/45	0.00298794	ADAMTSL1/IL6/ADAMTS6	3
GO:0034599	cellular response to oxidative stress	3/45	0.00420765	SLC1A1/FOS/IL6	3
GO:0062197	cellular response to chemical stress	3/45	0.00810429	SLC1A1/FOS/IL6	3
GO:0010035	response to inorganic substance	3/45	0.0154709	SLC1A1/FOS/IL6	3
GO:0008015	blood circulation	3/45	0.019643	EDN1/SLC1A1/ADRB2	3
GO:0003013	circulatory system process	3/45	0.0207742	EDN1/SLC1A1/ADRB2	3
GO:0044057	regulation of system process	3/45	0.0207742	EDN1/SLC1A1/ADRB2	3
GO:0006979	response to oxidative stress	3/45	0.0231425	SLC1A1/FOS/IL6	3
GO:0045859	regulation of protein kinase activity	3/45	0.0355499	SLC1A1/GADD45B/ADRB2	3
GO:0009611	response to wounding	3/45	0.0386928	SLC1A1/CLDN1/IL6	3
GO:0043549	regulation of kinase activity	3/45	0.0419741	SLC1A1/GADD45B/ADRB2	3
GO:0031329	regulation of cellular catabolic process	3/45	0.0453922	TIMP3/ADRB2/IL6	3

## Sheet: Table S4
Table S4. GO terms enriched by downregulated genes induced by GA-017 when compared to Con group.
GO_term	Description	GeneRatio	P_value	Gene_name	Count
GO:0048523	negative regulation of cellular process	29/129	0.000195475	FABP4/HYAL1/SESN3/VSIR/SFN/ITM2B/CAPG/SERPINB2/DCN/ID3/VSNL1/ABHD2/CNN1/GCG/ATP1B2/SESN1/CRYAB/EFNA5/NR1D1/TXNIP/LMO1/FGF2/LAPTM5/NOG/PLPP3/ARHGDIB/KLF9/HHATL/MXD1	29
GO:0006950	response to stress	28/129	0.00499401	FABP4/MX1/HYAL1/CLDN4/SESN3/SFN/NQO1/NT5E/ABHD2/EDNRA/MX2/C1R/SESN1/NR1D1/PTGS2/TXNIP/FGF2/CXCR4/LAPTM5/BST-2A/PLPP3/CREB3L3/PLA2G4A/PMAIP1/TNFRSF1B/TMEM117/STING1/MAP1LC3C	28
GO:0048583	regulation of response to stimulus	23/129	0.0107447	FABP4/CLDN4/SESN3/VSIR/DCN/NT5E/S100B/GCG/C1R/SESN1/NR1D1/PTGS2/FGF2/CXCR4/SPRY4/ADCYAP1/C1S/NOG/PLPP3/ARHGDIB/PLA2G4A/PMAIP1/STING1	23
GO:0007275	multicellular organism development	22/129	0.0183182	HYAL1/VSIR/SFN/LPAR6/DCN/CRABP2/VEGFA/EDNRA/ATP1B2/EFNA5/NR1D1/EFNA3/DLX3/FGF2/ADCYAP1/NOG/PLPP3/ARHGDIB/LAMA4/FGL1/SLITRK6/FGF7	22
GO:0042221	response to chemical	21/129	0.0107583	FABP4/HYAL1/SESN3/NQO1/NT5E/VSNL1/KCNMB1/ABHD2/EDNRA/GCG/SESN1/EFNA5/NR1D1/FGF2/CXCR4/AR/PLA2G4A/ACKR4/KLF9/PMAIP1/PDGFRA	21
GO:0009605	response to external stimulus	20/129	0.003903	FABP4/MX1/HYAL1/NQO1/NT5E/EDNRA/MX2/C1R/SESN1/EFNA5/NR1D1/PTGS2/FGF2/CXCR4/BST-2A/ACKR4/PMAIP1/PDGFRA/STING1/MAP1LC3C	20
GO:0009893	positive regulation of metabolic process	20/129	0.0157076	ACTG2/FABP4/ACTA2/CLDN4/VSIR/DCN/VEGFA/GCG/EFNA5/NR1D1/EFNA3/LMO1/FGF2/ADCYAP1/LAPTM5/PLPP3/CREB3L3/PMAIP1/STING1/FGF7	20
GO:0030154	cell differentiation	20/129	0.0215771	FABP4/MEDAG/VSIR/SFN/CRABP2/VEGFA/ABHD2/EDNRA/ATP1B2/EFNA5/NR1D1/ARL4A/TXNIP/EHF/DLX3/FGF2/ADCYAP1/NOG/PLPP3/SLITRK6	20
GO:0048869	cellular developmental process	20/129	0.0215771	FABP4/MEDAG/VSIR/SFN/CRABP2/VEGFA/ABHD2/EDNRA/ATP1B2/EFNA5/NR1D1/ARL4A/TXNIP/EHF/DLX3/FGF2/ADCYAP1/NOG/PLPP3/SLITRK6	20
GO:0051239	regulation of multicellular organismal process	19/129	0.00374088	FABP4/HYAL1/VSIR/SFN/DCN/CRABP2/VEGFA/EDNRA/EFNA5/NR1D1/EFNA3/LMO1/FGF2/PLPP3/ARHGDIB/PLA2G4A/LAMA4/STING1/FGF7	19
GO:0010604	positive regulation of macromolecule metabolic process	19/129	0.0119533	ACTG2/ACTA2/CLDN4/VSIR/DCN/VEGFA/GCG/EFNA5/NR1D1/EFNA3/LMO1/FGF2/ADCYAP1/LAPTM5/PLPP3/CREB3L3/PMAIP1/STING1/FGF7	19
GO:0044281	small molecule metabolic process	19/129	0.0307324	FABP4/NQO1/CRABP2/NT5E/AHCYL2/UGP2/GCG/NR1D1/THEM5/PTGS2/CYP1A1/CROT/FGF2/PLPP3/ST6GAL1/PLA2G4A/PMAIP1/ABAT/ATP6V1B1	19
GO:0065008	regulation of biological quality	18/129	0.00368247	CAPG/DCN/CRABP2/VSNL1/EDNRA/GCG/ATP1B2/EFNA5/NR1D1/PTGS2/CYP1A1/ADCYAP1/LAPTM5/PLPP3/PLA2G4A/PMAIP1/ABAT/SLITRK6	18
GO:0040011	locomotion	17/129	1.9053e-06	HYAL1/CLDN4/VSIR/DCN/VEGFA/ABHD2/EDNRA/ATP1B2/EFNA5/FGF2/CXCR4/PLPP3/ARHGDIB/ACKR4/LAMA4/PDGFRA/FGF7	17
GO:0051246	regulation of protein metabolic process	17/129	0.0125872	FABP4/CLDN4/VSIR/SFN/ITM2B/NQO1/VEGFA/GCG/EFNA5/EFNA3/FGF2/ADCYAP1/LAPTM5/PLPP3/PMAIP1/HHATL/FGF7	17
GO:0035556	intracellular signal transduction	17/129	0.0458915	VAV3/SESN3/SFN/DCN/S100B/EDNRA/GCG/SESN1/NR1D1/FGF2/CXCR4/ADCYAP1/ARHGDIB/PMAIP1/RHOV/RALGPS2/TMEM117	17
GO:0009653	anatomical structure morphogenesis	16/129	0.0068717	ACTG2/HYAL1/ACTA2/CLDN4/DCN/CRABP2/VEGFA/EDNRA/EFNA5/EFNA3/DLX3/FGF2/PLPP3/FGL1/SLITRK6/FGF7	16
GO:0051173	positive regulation of nitrogen compound metabolic process	16/129	0.0181333	CLDN4/VSIR/DCN/VEGFA/GCG/EFNA5/NR1D1/EFNA3/LMO1/FGF2/ADCYAP1/LAPTM5/PLPP3/CREB3L3/PMAIP1/FGF7	16
GO:0050793	regulation of developmental process	15/129	0.00760571	HYAL1/CLDN4/MEDAG/VSIR/SFN/DCN/CRABP2/VEGFA/EFNA5/NR1D1/EFNA3/FGF2/NOG/LAMA4/FGF7	15
GO:0065009	regulation of molecular function	15/129	0.0304165	FABP4/CLDN4/VSIR/SFN/NQO1/EDNRA/GCG/ATP1B2/EFNA5/EFNA3/FGF2/ADCYAP1/LAPTM5/PLPP3/PMAIP1	15
GO:0070887	cellular response to chemical stimulus	15/129	0.0410346	FABP4/HYAL1/NQO1/VSNL1/EDNRA/GCG/SESN1/EFNA5/NR1D1/FGF2/CXCR4/AR/PLA2G4A/KLF9/PMAIP1	15
GO:0010033	response to organic substance	15/129	0.0434445	FABP4/HYAL1/NQO1/NT5E/VSNL1/KCNMB1/ABHD2/EDNRA/GCG/EFNA5/NR1D1/CXCR4/AR/KLF9/PMAIP1	15
GO:0016477	cell migration	14/129	6.68256e-05	HYAL1/CLDN4/VSIR/DCN/VEGFA/ABHD2/EDNRA/ATP1B2/FGF2/CXCR4/PLPP3/ARHGDIB/LAMA4/FGF7	14
GO:0048870	cell motility	14/129	0.000282034	HYAL1/CLDN4/VSIR/DCN/VEGFA/ABHD2/EDNRA/ATP1B2/FGF2/CXCR4/PLPP3/ARHGDIB/LAMA4/FGF7	14
GO:0007155	cell adhesion	14/129	0.000768674	HYAL1/POSTN/VSIR/SPP1/NT5E/VEGFA/ATP1B2/EFNA5/CXCR4/PLPP3/LAMA4/DSC1/FAP/ITGA10	14
GO:1901700	response to oxygen-containing compound	14/129	0.00144859	FABP4/HYAL1/SESN3/NQO1/NT5E/VSNL1/KCNMB1/ABHD2/EDNRA/GCG/SESN1/EFNA5/NR1D1/KLF9	14
GO:0008283	cell population proliferation	14/129	0.00479316	FABP4/HYAL1/VSIR/SFN/VEGFA/CNN1/NR1D1/LMO1/DLX3/FGF2/PLA2G4A/KLF9/FGL1/FGF7	14
GO:0006952	defense response	14/129	0.0187255	FABP4/MX1/HYAL1/NQO1/NT5E/MX2/C1R/NR1D1/PTGS2/LAPTM5/BST-2A/PMAIP1/TNFRSF1B/STING1	14
GO:0030334	regulation of cell migration	13/129	8.37818e-06	HYAL1/CLDN4/VSIR/DCN/VEGFA/ABHD2/ATP1B2/FGF2/CXCR4/PLPP3/ARHGDIB/LAMA4/FGF7	13
GO:2000145	regulation of cell motility	13/129	1.39041e-05	HYAL1/CLDN4/VSIR/DCN/VEGFA/ABHD2/ATP1B2/FGF2/CXCR4/PLPP3/ARHGDIB/LAMA4/FGF7	13
GO:0040012	regulation of locomotion	13/129	2.24151e-05	HYAL1/CLDN4/VSIR/DCN/VEGFA/ABHD2/ATP1B2/FGF2/CXCR4/PLPP3/ARHGDIB/LAMA4/FGF7	13
GO:0009888	tissue development	13/129	0.0141302	ACTG2/HYAL1/ACTA2/CLDN4/SFN/SPP1/EDNRA/TXNIP/EHF/DLX3/FGF2/NOG/FGF7	13
GO:0051247	positive regulation of protein metabolic process	12/129	0.00281873	CLDN4/VSIR/VEGFA/GCG/EFNA5/EFNA3/FGF2/ADCYAP1/LAPTM5/PLPP3/PMAIP1/FGF7	12
GO:0007267	cell-cell signaling	12/129	0.00427116	WNT5A/VSNL1/EDNRA/GCG/EFNA5/NR1D1/DLX3/FGF2/ADCYAP1/PLPP3/PLA2G4A/FGF7	12
GO:0042127	regulation of cell population proliferation	12/129	0.00696581	FABP4/HYAL1/VSIR/SFN/VEGFA/CNN1/NR1D1/LMO1/FGF2/PLA2G4A/KLF9/FGF7	12
GO:0009719	response to endogenous stimulus	12/129	0.00811523	HYAL1/DCN/ABHD2/EDNRA/EFNA5/NR1D1/DLX3/FGF2/AR/NOG/KLF9/FGF7	12
GO:0050790	regulation of catalytic activity	12/129	0.0184569	FABP4/CLDN4/VSIR/SFN/NQO1/GCG/EFNA5/EFNA3/FGF2/ADCYAP1/LAPTM5/PMAIP1	12
GO:0042592	homeostatic process	12/129	0.0208668	FABP4/FTH1/NQO1/NT5E/VSNL1/EDNRA/GCG/ATP1B2/EFNA5/NR1D1/LMO1/FGF2	12
GO:0051172	negative regulation of nitrogen compound metabolic process	12/129	0.0253958	FABP4/SFN/ITM2B/NQO1/ID3/CRYAB/NR1D1/TXNIP/LMO1/PLPP3/HHATL/MXD1	12
GO:0022008	neurogenesis	11/129	0.00223369	CRABP2/VEGFA/EDNRA/ATP1B2/EFNA5/NR1D1/DLX3/FGF2/ADCYAP1/PLPP3/SLITRK6	11
GO:2000026	regulation of multicellular organismal development	11/129	0.00516076	HYAL1/VSIR/SFN/DCN/CRABP2/VEGFA/EFNA5/NR1D1/EFNA3/FGF2/LAMA4	11
GO:0044093	positive regulation of molecular function	11/129	0.0105426	CLDN4/VSIR/EDNRA/GCG/ATP1B2/EFNA3/FGF2/ADCYAP1/LAPTM5/PLPP3/PMAIP1	11
GO:0007399	nervous system development	11/129	0.0331305	CRABP2/VEGFA/EDNRA/ATP1B2/EFNA5/NR1D1/DLX3/FGF2/ADCYAP1/PLPP3/SLITRK6	11
GO:0009607	response to biotic stimulus	11/129	0.0491391	FABP4/MX1/HYAL1/NQO1/MX2/C1R/TXNIP/LAPTM5/BST-2A/PMAIP1/STING1	11
GO:0048878	chemical homeostasis	10/129	0.0054473	FABP4/FTH1/NT5E/VSNL1/EDNRA/GCG/ATP1B2/EFNA5/NR1D1/FGF2	10
GO:0031399	regulation of protein modification process	10/129	0.0232909	FABP4/SFN/VEGFA/GCG/EFNA5/FGF2/ADCYAP1/PLPP3/HHATL/FGF7	10
GO:0071495	cellular response to endogenous stimulus	10/129	0.0254622	HYAL1/DCN/EDNRA/EFNA5/DLX3/FGF2/AR/NOG/KLF9/FGF7	10
GO:0080134	regulation of response to stress	10/129	0.0356188	FABP4/CLDN4/SESN3/NT5E/SESN1/NR1D1/PTGS2/FGF2/PMAIP1/STING1	10
GO:0022603	regulation of anatomical structure morphogenesis	9/129	0.000447965	HYAL1/CLDN4/DCN/CRABP2/VEGFA/EFNA5/EFNA3/FGF2/FGF7	9
GO:0019725	cellular homeostasis	9/129	0.00330884	FTH1/NQO1/VSNL1/EDNRA/GCG/ATP1B2/EFNA5/NR1D1/FGF2	9
GO:0140352	export from cell	9/129	0.00386254	VSNL1/GCG/ATP1B2/EFNA5/NR1D1/ADCYAP1/PLA2G4A/RAB27B/FGF7	9
GO:0048699	generation of neurons	9/129	0.00556726	CRABP2/VEGFA/EDNRA/ATP1B2/EFNA5/DLX3/FGF2/ADCYAP1/SLITRK6	9
GO:0010558	negative regulation of macromolecule biosynthetic process	9/129	0.0059691	FABP4/ITM2B/ID3/CRYAB/NR1D1/TXNIP/LMO1/HHATL/MXD1	9
GO:0001932	regulation of protein phosphorylation	9/129	0.00832528	FABP4/SFN/VEGFA/GCG/EFNA5/FGF2/ADCYAP1/PLPP3/FGF7	9
GO:0031327	negative regulation of cellular biosynthetic process	9/129	0.0100452	FABP4/ITM2B/ID3/CRYAB/NR1D1/TXNIP/LMO1/HHATL/MXD1	9
GO:0051094	positive regulation of developmental process	9/129	0.0106744	HYAL1/MEDAG/VSIR/SFN/DCN/CRABP2/VEGFA/EFNA5/FGF2	9
GO:0009890	negative regulation of biosynthetic process	9/129	0.0120213	FABP4/ITM2B/ID3/CRYAB/NR1D1/TXNIP/LMO1/HHATL/MXD1	9
GO:0051336	regulation of hydrolase activity	9/129	0.0120213	CLDN4/VSIR/SFN/EFNA5/EFNA3/FGF2/ADCYAP1/LAPTM5/PMAIP1	9
GO:0042325	regulation of phosphorylation	9/129	0.0168295	FABP4/SFN/VEGFA/GCG/EFNA5/FGF2/ADCYAP1/PLPP3/FGF7	9
GO:0019220	regulation of phosphate metabolic process	9/129	0.0348136	FABP4/SFN/VEGFA/GCG/EFNA5/FGF2/ADCYAP1/PLPP3/FGF7	9
GO:0051174	regulation of phosphorus metabolic process	9/129	0.0348136	FABP4/SFN/VEGFA/GCG/EFNA5/FGF2/ADCYAP1/PLPP3/FGF7	9
GO:0090130	tissue migration	8/129	4.02004e-05	ACTG2/HYAL1/ACTA2/DCN/VEGFA/FGF2/PLPP3/FGF7	8
GO:0001667	ameboidal-type cell migration	8/129	0.00010264	HYAL1/DCN/VEGFA/EDNRA/FGF2/PLPP3/ARHGDIB/FGF7	8
GO:0050673	epithelial cell proliferation	8/129	0.0001975	HYAL1/SFN/VEGFA/NR1D1/FGF2/KLF9/FGL1/FGF7	8
GO:0030335	positive regulation of cell migration	8/129	0.00097366	HYAL1/CLDN4/VSIR/VEGFA/FGF2/CXCR4/PLPP3/FGF7	8
GO:2000147	positive regulation of cell motility	8/129	0.00121828	HYAL1/CLDN4/VSIR/VEGFA/FGF2/CXCR4/PLPP3/FGF7	8
GO:0040017	positive regulation of locomotion	8/129	0.00135775	HYAL1/CLDN4/VSIR/VEGFA/FGF2/CXCR4/PLPP3/FGF7	8
GO:0001568	blood vessel development	8/129	0.00298871	HYAL1/DCN/VEGFA/EDNRA/EFNA3/DLX3/FGF2/PLPP3	8
GO:0001944	vasculature development	8/129	0.00499643	HYAL1/DCN/VEGFA/EDNRA/EFNA3/DLX3/FGF2/PLPP3	8
GO:0051050	positive regulation of transport	8/129	0.00632533	SFN/VSNL1/EDNRA/GCG/ATP1B2/ADCYAP1/PLA2G4A/RAB27B	8
GO:0055082	intracellular chemical homeostasis	8/129	0.00632533	FTH1/VSNL1/EDNRA/GCG/ATP1B2/EFNA5/NR1D1/FGF2	8
GO:0009887	animal organ morphogenesis	8/129	0.00911695	ACTG2/HYAL1/ACTA2/EDNRA/DLX3/FGF2/FGL1/FGF7	8
GO:0032940	secretion by cell	8/129	0.00911695	VSNL1/GCG/EFNA5/NR1D1/ADCYAP1/PLA2G4A/RAB27B/FGF7	8
GO:0030182	neuron differentiation	8/129	0.0119447	CRABP2/EDNRA/ATP1B2/EFNA5/DLX3/FGF2/ADCYAP1/SLITRK6	8
GO:0007167	enzyme-linked receptor protein signaling pathway	8/129	0.0135798	DCN/EFNA5/TXNIP/EFNA3/DLX3/FGF2/NOG/FGF7	8
GO:0043085	positive regulation of catalytic activity	8/129	0.0163321	CLDN4/VSIR/GCG/EFNA3/FGF2/ADCYAP1/LAPTM5/PMAIP1	8
GO:0072359	circulatory system development	8/129	0.0163321	HYAL1/DCN/VEGFA/EDNRA/EFNA3/DLX3/FGF2/PLPP3	8
GO:0032787	monocarboxylic acid metabolic process	8/129	0.0183785	FABP4/CRABP2/NR1D1/PTGS2/CYP1A1/CROT/PLA2G4A/ABAT	8
GO:0046903	secretion	8/129	0.0256174	VSNL1/GCG/EFNA5/NR1D1/ADCYAP1/PLA2G4A/RAB27B/FGF7	8
GO:0060429	epithelium development	8/129	0.0398995	CLDN4/SFN/EDNRA/TXNIP/EHF/DLX3/FGF2/FGF7	8
GO:0050678	regulation of epithelial cell proliferation	7/129	0.000574051	HYAL1/SFN/VEGFA/NR1D1/FGF2/KLF9/FGF7	7
GO:0006979	response to oxidative stress	7/129	0.00167856	HYAL1/SESN3/NQO1/EDNRA/SESN1/PTGS2/TXNIP	7
GO:1903530	regulation of secretion by cell	7/129	0.00188915	VSNL1/GCG/EFNA5/NR1D1/ADCYAP1/PLA2G4A/RAB27B	7
GO:0051046	regulation of secretion	7/129	0.00294363	VSNL1/GCG/EFNA5/NR1D1/ADCYAP1/PLA2G4A/RAB27B	7
GO:0051345	positive regulation of hydrolase activity	7/129	0.00294363	CLDN4/VSIR/EFNA3/FGF2/ADCYAP1/LAPTM5/PMAIP1	7
GO:0010817	regulation of hormone levels	7/129	0.00634631	CRABP2/VSNL1/GCG/EFNA5/NR1D1/CYP1A1/ADCYAP1	7
GO:0030155	regulation of cell adhesion	7/129	0.00753144	HYAL1/VSIR/VEGFA/EFNA5/CXCR4/PLPP3/LAMA4	7
GO:0032880	regulation of protein localization	7/129	0.0103832	SFN/VSNL1/EDNRA/GCG/EFNA5/NR1D1/ADCYAP1	7
GO:0001934	positive regulation of protein phosphorylation	7/129	0.0112049	VEGFA/GCG/EFNA5/FGF2/ADCYAP1/PLPP3/FGF7	7
GO:0042327	positive regulation of phosphorylation	7/129	0.0129884	VEGFA/GCG/EFNA5/FGF2/ADCYAP1/PLPP3/FGF7	7
GO:0045892	negative regulation of DNA-templated transcription	7/129	0.0171547	FABP4/ID3/CRYAB/NR1D1/TXNIP/LMO1/MXD1	7
GO:1902679	negative regulation of RNA biosynthetic process	7/129	0.0171547	FABP4/ID3/CRYAB/NR1D1/TXNIP/LMO1/MXD1	7
GO:1903507	negative regulation of nucleic acid-templated transcription	7/129	0.0171547	FABP4/ID3/CRYAB/NR1D1/TXNIP/LMO1/MXD1	7
GO:0060341	regulation of cellular localization	7/129	0.0195586	SFN/VSNL1/EDNRA/GCG/EFNA5/NR1D1/ADCYAP1	7
GO:0010562	positive regulation of phosphorus metabolic process	7/129	0.0235935	VEGFA/GCG/EFNA5/FGF2/ADCYAP1/PLPP3/FGF7	7
GO:0045937	positive regulation of phosphate metabolic process	7/129	0.0235935	VEGFA/GCG/EFNA5/FGF2/ADCYAP1/PLPP3/FGF7	7
GO:0051130	positive regulation of cellular component organization	7/129	0.0281707	HYAL1/DCN/CRABP2/VEGFA/ATP1B2/EFNA5/PMAIP1	7
GO:0051253	negative regulation of RNA metabolic process	7/129	0.0281707	FABP4/ID3/CRYAB/NR1D1/TXNIP/LMO1/MXD1	7
GO:0031401	positive regulation of protein modification process	7/129	0.0315376	VEGFA/GCG/EFNA5/FGF2/ADCYAP1/PLPP3/FGF7	7
GO:0040007	growth	7/129	0.0351656	HYAL1/SFN/CRABP2/EDNRA/EFNA5/FGF2/FGF7	7
GO:0045934	negative regulation of nucleobase-containing compound metabolic process	7/129	0.0454213	FABP4/ID3/CRYAB/NR1D1/TXNIP/LMO1/MXD1	7
GO:0010632	regulation of epithelial cell migration	6/129	0.000351064	HYAL1/DCN/VEGFA/FGF2/PLPP3/FGF7	6
GO:0008544	epidermis development	6/129	0.000892084	CLDN4/SFN/TXNIP/DLX3/FGF2/FGF7	6
GO:0042886	amide transport	6/129	0.000892084	VSNL1/GCG/EFNA5/NR1D1/ADCYAP1/SLC14A1	6
GO:0010631	epithelial cell migration	6/129	0.00123344	HYAL1/DCN/VEGFA/FGF2/PLPP3/FGF7	6
GO:0090132	epithelium migration	6/129	0.00123344	HYAL1/DCN/VEGFA/FGF2/PLPP3/FGF7	6
GO:0023061	signal release	6/129	0.00861043	VSNL1/GCG/EFNA5/NR1D1/ADCYAP1/PLA2G4A	6
GO:0007169	transmembrane receptor protein tyrosine kinase signaling pathway	6/129	0.0103616	DCN/EFNA5/TXNIP/EFNA3/FGF2/FGF7	6
GO:0031175	neuron projection development	6/129	0.0103616	CRABP2/EDNRA/ATP1B2/EFNA5/ADCYAP1/SLITRK6	6
GO:0048729	tissue morphogenesis	6/129	0.0103616	ACTG2/ACTA2/EDNRA/DLX3/FGF2/FGF7	6
GO:0052547	regulation of peptidase activity	6/129	0.0113261	CLDN4/VSIR/SFN/EFNA3/LAPTM5/PMAIP1	6
GO:0001525	angiogenesis	6/129	0.0123525	HYAL1/DCN/VEGFA/EDNRA/EFNA3/FGF2	6
GO:0071363	cellular response to growth factor stimulus	6/129	0.0184799	HYAL1/DCN/DLX3/FGF2/NOG/FGF7	6
GO:0009611	response to wounding	6/129	0.019917	CLDN4/ABHD2/EDNRA/FGF2/PLPP3/PLA2G4A	6
GO:0048514	blood vessel morphogenesis	6/129	0.0214286	HYAL1/DCN/VEGFA/EDNRA/EFNA3/FGF2	6
GO:0070848	response to growth factor	6/129	0.0214286	HYAL1/DCN/DLX3/FGF2/NOG/FGF7	6
GO:0006935	chemotaxis	6/129	0.0230163	EDNRA/EFNA5/FGF2/CXCR4/ACKR4/PDGFRA	6
GO:0030855	epithelial cell differentiation	6/129	0.0246814	SFN/EDNRA/TXNIP/EHF/DLX3/FGF2	6
GO:0042330	taxis	6/129	0.0246814	EDNRA/EFNA5/FGF2/CXCR4/ACKR4/PDGFRA	6
GO:0045597	positive regulation of cell differentiation	6/129	0.0264254	MEDAG/VSIR/SFN/CRABP2/EFNA5/FGF2	6
GO:0048666	neuron development	6/129	0.0342168	CRABP2/EDNRA/ATP1B2/EFNA5/ADCYAP1/SLITRK6	6
GO:0009725	response to hormone	6/129	0.0386173	ABHD2/EDNRA/EFNA5/NR1D1/AR/KLF9	6
GO:0002791	regulation of peptide secretion	5/129	0.000306833	VSNL1/GCG/EFNA5/NR1D1/ADCYAP1	5
GO:0090087	regulation of peptide transport	5/129	0.000306833	VSNL1/GCG/EFNA5/NR1D1/ADCYAP1	5
GO:0090276	regulation of peptide hormone secretion	5/129	0.000306833	VSNL1/GCG/EFNA5/NR1D1/ADCYAP1	5
GO:0010952	positive regulation of peptidase activity	5/129	0.000524343	CLDN4/VSIR/EFNA3/LAPTM5/PMAIP1	5
GO:0010634	positive regulation of epithelial cell migration	5/129	0.000841149	HYAL1/VEGFA/FGF2/PLPP3/FGF7	5
GO:0030073	insulin secretion	5/129	0.000841149	VSNL1/GCG/EFNA5/NR1D1/ADCYAP1	5
GO:0045927	positive regulation of growth	5/129	0.0015579	HYAL1/SFN/CRABP2/EFNA5/FGF2	5
GO:0046883	regulation of hormone secretion	5/129	0.0015579	VSNL1/GCG/EFNA5/NR1D1/ADCYAP1	5
GO:0030336	negative regulation of cell migration	5/129	0.00223618	DCN/ABHD2/ATP1B2/FGF2/ARHGDIB	5
GO:1903532	positive regulation of secretion by cell	5/129	0.00223618	VSNL1/GCG/ADCYAP1/PLA2G4A/RAB27B	5
GO:0040013	negative regulation of locomotion	5/129	0.00264599	DCN/ABHD2/ATP1B2/FGF2/ARHGDIB	5
GO:2000146	negative regulation of cell motility	5/129	0.00264599	DCN/ABHD2/ATP1B2/FGF2/ARHGDIB	5
GO:0002790	peptide secretion	5/129	0.00310768	VSNL1/GCG/EFNA5/NR1D1/ADCYAP1	5
GO:0030072	peptide hormone secretion	5/129	0.00310768	VSNL1/GCG/EFNA5/NR1D1/ADCYAP1	5
GO:0045765	regulation of angiogenesis	5/129	0.00310768	HYAL1/DCN/VEGFA/EFNA3/FGF2	5
GO:0015833	peptide transport	5/129	0.00362482	VSNL1/GCG/EFNA5/NR1D1/ADCYAP1	5
GO:0043588	skin development	5/129	0.00362482	CLDN4/SFN/TXNIP/DLX3/FGF7	5
GO:0051047	positive regulation of secretion	5/129	0.00362482	VSNL1/GCG/ADCYAP1/PLA2G4A/RAB27B	5
GO:1901342	regulation of vasculature development	5/129	0.00420102	HYAL1/DCN/VEGFA/EFNA3/FGF2	5
GO:0052548	regulation of endopeptidase activity	5/129	0.00483983	VSIR/SFN/EFNA3/LAPTM5/PMAIP1	5
GO:0009306	protein secretion	5/129	0.0090949	VSNL1/GCG/EFNA5/NR1D1/ADCYAP1	5
GO:0009914	hormone transport	5/129	0.0090949	VSNL1/GCG/EFNA5/NR1D1/ADCYAP1	5
GO:0016049	cell growth	5/129	0.0090949	HYAL1/SFN/CRABP2/EDNRA/EFNA5	5
GO:0045862	positive regulation of proteolysis	5/129	0.0090949	CLDN4/VSIR/EFNA3/LAPTM5/PMAIP1	5
GO:0046879	hormone secretion	5/129	0.0090949	VSNL1/GCG/EFNA5/NR1D1/ADCYAP1	5
GO:0035592	establishment of protein localization to extracellular region	5/129	0.0101816	VSNL1/GCG/EFNA5/NR1D1/ADCYAP1	5
GO:0071692	protein localization to extracellular region	5/129	0.0101816	VSNL1/GCG/EFNA5/NR1D1/ADCYAP1	5
GO:0051223	regulation of protein transport	5/129	0.0186082	SFN/VSNL1/GCG/EFNA5/NR1D1	5
GO:0070201	regulation of establishment of protein localization	5/129	0.0241645	SFN/VSNL1/GCG/EFNA5/NR1D1	5
GO:0016055	Wnt signaling pathway	5/129	0.0330941	WNT5A/EDNRA/DLX3/FGF2/PLPP3	5
GO:0198738	cell-cell signaling by wnt	5/129	0.0330941	WNT5A/EDNRA/DLX3/FGF2/PLPP3	5
GO:0006631	fatty acid metabolic process	5/129	0.0409847	FABP4/PTGS2/CYP1A1/CROT/PLA2G4A	5
GO:1905114	cell surface receptor signaling pathway involved in cell-cell signaling	5/129	0.043848	WNT5A/EDNRA/DLX3/FGF2/PLPP3	5
GO:0071333	cellular response to glucose stimulus	4/129	0.000842088	VSNL1/GCG/EFNA5/NR1D1	4
GO:0030307	positive regulation of cell growth	4/129	0.00114676	HYAL1/SFN/CRABP2/EFNA5	4
GO:0050796	regulation of insulin secretion	4/129	0.00114676	VSNL1/GCG/EFNA5/NR1D1	4
GO:0071322	cellular response to carbohydrate stimulus	4/129	0.00114676	VSNL1/GCG/EFNA5/NR1D1	4
GO:0071326	cellular response to monosaccharide stimulus	4/129	0.00114676	VSNL1/GCG/EFNA5/NR1D1	4
GO:0071331	cellular response to hexose stimulus	4/129	0.00114676	VSNL1/GCG/EFNA5/NR1D1	4
GO:1903510	mucopolysaccharide metabolic process	4/129	0.00114676	HYAL1/DCN/EDNRA/FGF2	4
GO:0098773	skin epidermis development	4/129	0.00152115	CLDN4/SFN/DLX3/FGF7	4
GO:0001678	intracellular glucose homeostasis	4/129	0.00197298	VSNL1/GCG/EFNA5/NR1D1	4
GO:0009749	response to glucose	4/129	0.00250988	VSNL1/GCG/EFNA5/NR1D1	4
GO:0010594	regulation of endothelial cell migration	4/129	0.00250988	DCN/VEGFA/FGF2/PLPP3	4
GO:0009746	response to hexose	4/129	0.00313933	VSNL1/GCG/EFNA5/NR1D1	4
GO:0010950	positive regulation of endopeptidase activity	4/129	0.00313933	VSIR/EFNA3/LAPTM5/PMAIP1	4
GO:0034284	response to monosaccharide	4/129	0.00313933	VSNL1/GCG/EFNA5/NR1D1	4
GO:0009743	response to carbohydrate	4/129	0.00386857	VSNL1/GCG/EFNA5/NR1D1	4
GO:0030203	glycosaminoglycan metabolic process	4/129	0.00386857	HYAL1/DCN/EDNRA/FGF2	4
GO:0006022	aminoglycan metabolic process	4/129	0.00565423	HYAL1/DCN/EDNRA/FGF2	4
GO:0007409	axonogenesis	4/129	0.00565423	CRABP2/EDNRA/EFNA5/SLITRK6	4
GO:0050679	positive regulation of epithelial cell proliferation	4/129	0.00565423	HYAL1/VEGFA/FGF2/FGF7	4
GO:0000302	response to reactive oxygen species	4/129	0.0067238	HYAL1/SESN3/NQO1/SESN1	4
GO:0043542	endothelial cell migration	4/129	0.0067238	DCN/VEGFA/FGF2/PLPP3	4
GO:0045444	fat cell differentiation	4/129	0.0067238	FABP4/MEDAG/NR1D1/ARL4A	4
GO:0042063	gliogenesis	4/129	0.00791943	ATP1B2/NR1D1/FGF2/PLPP3	4
GO:0050708	regulation of protein secretion	4/129	0.00791943	VSNL1/GCG/EFNA5/NR1D1	4
GO:0061564	axon development	4/129	0.00791943	CRABP2/EDNRA/EFNA5/SLITRK6	4
GO:0009913	epidermal cell differentiation	4/129	0.00924685	SFN/TXNIP/DLX3/FGF2	4
GO:0050767	regulation of neurogenesis	4/129	0.00924685	CRABP2/EFNA5/NR1D1/FGF2	4
GO:0033500	carbohydrate homeostasis	4/129	0.0107114	VSNL1/GCG/EFNA5/NR1D1	4
GO:0042593	glucose homeostasis	4/129	0.0107114	VSNL1/GCG/EFNA5/NR1D1	4
GO:1902074	response to salt	4/129	0.0107114	FABP4/NT5E/KCNMB1/EDNRA	4
GO:0048667	cell morphogenesis involved in neuron differentiation	4/129	0.0123181	CRABP2/EDNRA/EFNA5/SLITRK6	4
GO:0032990	cell part morphogenesis	4/129	0.0140715	CRABP2/EDNRA/EFNA5/SLITRK6	4
GO:0048812	neuron projection morphogenesis	4/129	0.0140715	CRABP2/EDNRA/EFNA5/SLITRK6	4
GO:0048858	cell projection morphogenesis	4/129	0.0140715	CRABP2/EDNRA/EFNA5/SLITRK6	4
GO:0050731	positive regulation of peptidyl-tyrosine phosphorylation	4/129	0.0140715	VEGFA/EFNA5/PLPP3/FGF7	4
GO:0120039	plasma membrane bounded cell projection morphogenesis	4/129	0.0140715	CRABP2/EDNRA/EFNA5/SLITRK6	4
GO:0051302	regulation of cell division	4/129	0.0159757	SFN/VEGFA/TXNIP/FGF2	4
GO:0051960	regulation of nervous system development	4/129	0.0159757	CRABP2/EFNA5/NR1D1/FGF2	4
GO:0001558	regulation of cell growth	4/129	0.0180346	HYAL1/SFN/CRABP2/EFNA5	4
GO:0048732	gland development	4/129	0.0180346	EDNRA/FGF2/FGL1/FGF7	4
GO:0010720	positive regulation of cell development	4/129	0.0202515	VSIR/CRABP2/EFNA5/FGF2	4
GO:0050727	regulation of inflammatory response	4/129	0.0251707	FABP4/NT5E/NR1D1/PTGS2	4
GO:0000904	cell morphogenesis involved in differentiation	4/129	0.0370084	CRABP2/EDNRA/EFNA5/SLITRK6	4
GO:0018108	peptidyl-tyrosine phosphorylation	4/129	0.0403919	VEGFA/EFNA5/PLPP3/FGF7	4
GO:0032989	cellular component morphogenesis	4/129	0.0403919	CRABP2/EDNRA/EFNA5/SLITRK6	4
GO:0050730	regulation of peptidyl-tyrosine phosphorylation	4/129	0.0403919	VEGFA/EFNA5/PLPP3/FGF7	4
GO:0048511	rhythmic process	4/129	0.0439461	TP63/NR1D1/AHR/KLF9	4
GO:0018212	peptidyl-tyrosine modification	4/129	0.0476708	VEGFA/EFNA5/PLPP3/FGF7	4
GO:0002793	positive regulation of peptide secretion	3/129	0.0043571	VSNL1/GCG/ADCYAP1	3
GO:0090277	positive regulation of peptide hormone secretion	3/129	0.0043571	VSNL1/GCG/ADCYAP1	3
GO:0043616	keratinocyte proliferation	3/129	0.00583696	SFN/KLF9/FGF7	3
GO:0044344	cellular response to fibroblast growth factor stimulus	3/129	0.00583696	HYAL1/FGF2/FGF7	3
GO:0071774	response to fibroblast growth factor	3/129	0.00583696	HYAL1/FGF2/FGF7	3
GO:0001938	positive regulation of endothelial cell proliferation	3/129	0.00758283	VEGFA/FGF2/FGF7	3
GO:0046887	positive regulation of hormone secretion	3/129	0.00758283	VSNL1/GCG/ADCYAP1	3
GO:0050769	positive regulation of neurogenesis	3/129	0.00758283	CRABP2/EFNA5/FGF2	3
GO:0062013	positive regulation of small molecule metabolic process	3/129	0.00758283	GCG/NR1D1/PMAIP1	3
GO:0010595	positive regulation of endothelial cell migration	3/129	0.00960505	VEGFA/FGF2/PLPP3	3
GO:0048588	developmental cell growth	3/129	0.00960505	CRABP2/EDNRA/EFNA5	3
GO:0048639	positive regulation of developmental growth	3/129	0.00960505	CRABP2/EFNA5/FGF2	3
GO:0045766	positive regulation of angiogenesis	3/129	0.0119119	HYAL1/VEGFA/FGF2	3
GO:1904018	positive regulation of vasculature development	3/129	0.0119119	HYAL1/VEGFA/FGF2	3
GO:0009267	cellular response to starvation	3/129	0.0145095	SESN1/PMAIP1/MAP1LC3C	3
GO:0031346	positive regulation of cell projection organization	3/129	0.0145095	CRABP2/ATP1B2/EFNA5	3
GO:0051962	positive regulation of nervous system development	3/129	0.0145095	CRABP2/EFNA5/FGF2	3
GO:0120254	olefinic compound metabolic process	3/129	0.0145095	PTGS2/CYP1A1/PLA2G4A	3
GO:0001763	morphogenesis of a branching structure	3/129	0.0174026	EDNRA/FGF2/FGF7	3
GO:0031589	cell-substrate adhesion	3/129	0.0174026	VEGFA/ATP1B2/EFNA5	3
GO:0042594	response to starvation	3/129	0.0174026	SESN1/PMAIP1/MAP1LC3C	3
GO:0060560	developmental growth involved in morphogenesis	3/129	0.0174026	CRABP2/EDNRA/EFNA5	3
GO:0061138	morphogenesis of a branching epithelium	3/129	0.0174026	EDNRA/FGF2/FGF7	3
GO:1901654	response to ketone	3/129	0.0174026	ABHD2/EFNA5/KLF9	3
GO:0001935	endothelial cell proliferation	3/129	0.0205939	VEGFA/FGF2/FGF7	3
GO:0001936	regulation of endothelial cell proliferation	3/129	0.0205939	VEGFA/FGF2/FGF7	3
GO:0070374	positive regulation of ERK1 and ERK2 cascade	3/129	0.0205939	GCG/FGF2/ADCYAP1	3
GO:0031669	cellular response to nutrient levels	3/129	0.0240848	SESN1/PMAIP1/MAP1LC3C	3
GO:0001666	response to hypoxia	3/129	0.0278753	EDNRA/CXCR4/PMAIP1	3
GO:0010001	glial cell differentiation	3/129	0.0319643	NR1D1/FGF2/PLPP3	3
GO:1901888	regulation of cell junction assembly	3/129	0.0319643	VEGFA/EFNA5/SLITRK6	3
GO:0006814	sodium ion transport	3/129	0.0363493	ATP1B3/EDNRA/ATP1B2	3
GO:0010975	regulation of neuron projection development	3/129	0.0363493	CRABP2/ATP1B2/EFNA5	3
GO:0036293	response to decreased oxygen levels	3/129	0.0363493	EDNRA/CXCR4/PMAIP1	3
GO:0043281	regulation of cysteine-type endopeptidase activity involved in apoptotic process	3/129	0.0363493	SFN/LAPTM5/PMAIP1	3
GO:0031668	cellular response to extracellular stimulus	3/129	0.041027	SESN1/PMAIP1/MAP1LC3C	3
GO:2000116	regulation of cysteine-type endopeptidase activity	3/129	0.041027	SFN/LAPTM5/PMAIP1	3
GO:0032535	regulation of cellular component size	3/129	0.0459931	CAPG/CRABP2/EFNA5	3
GO:0070372	regulation of ERK1 and ERK2 cascade	3/129	0.0459931	GCG/FGF2/ADCYAP1	3
GO:0070482	response to oxygen levels	3/129	0.0459931	EDNRA/CXCR4/PMAIP1	3
GO:0071356	cellular response to tumor necrosis factor	3/129	0.0459931	FABP4/HYAL1/NR1D1	3
GO:0090287	regulation of cellular response to growth factor stimulus	3/129	0.0459931	DCN/FGF2/NOG	3
GO:1901136	carbohydrate derivative catabolic process	3/129	0.0459931	HYAL1/NT5E/FGF2	3

## Sheet: Table S5
Table S5. GO terms enriched by downregulated genes induced by verteporfin when compared to Con group.
GO_term	Description	GeneRatio	P_value	Gene_name	Count
GO:0007275	multicellular organism development	47/240	2.04641e-05	COL3A1/COL5A2/APP/ADAMTS1/COL1A2/ALCAM/ADAM10/NRP2/EFNB2/BMPR2/B4GALT1/USP9X/ROCK1/SLC7A11/MET/GJA1/SEMA4F/ADGRG6/VPS13B/PCDH18/TGFBR1/HS2ST1/LPAR6/LRP6/LAMA4/EDNRA/TWSG1/EDNRB/EFNA5/BMPR1B/UGCG/CEP120/ARID2/TGFB2/ATP1B2/INHBA/PLPP3/MYSM1/SMAD5/IGF2/IFT74/SLITRK6/SLC1A3/CHODL/ANGPT1/RELN/SLIT2	47
GO:0048731	system development	40/240	2.68027e-05	COL3A1/COL5A2/APP/ADAMTS1/COL1A2/ALCAM/ADAM10/NRP2/EFNB2/BMPR2/B4GALT1/USP9X/ROCK1/SLC7A11/GJA1/SEMA4F/ADGRG6/VPS13B/PCDH18/TGFBR1/HS2ST1/EDNRA/TWSG1/EDNRB/EFNA5/BMPR1B/UGCG/CEP120/ARID2/ATP1B2/INHBA/PLPP3/SMAD5/IFT74/SLITRK6/SLC1A3/CHODL/ANGPT1/RELN/SLIT2	40
GO:0042221	response to chemical	39/240	0.000590936	COL3A1/COL5A2/APP/COL1A2/ITGB1/IGFBP5/ADAM9/ALCAM/ADAM10/NRP2/EFNB2/ADAM17/ROCK1/SESN3/UBE4A/SLC7A11/MET/CPEB4/TGFBR1/ABHD2/LRP6/KCNMB1/EDNRA/ITPR2/EDNRB/EFNA5/UGCG/TGFB2/USP15/INHBA/SMAD5/ACKR4/IFNGR1/DNAJC10/RAB11FIP2/SLC1A3/CREBRF/PDGFRA/ESR2	39
GO:0030154	cell differentiation	37/240	0.00232379	COL3A1/COL5A2/APP/NOTCH2/ITGB1/ADAM9/ALCAM/NRP2/EFNB2/B4GALT1/USP9X/ROCK1/MET/SEMA4F/ADGRG6/VPS13B/TGFBR1/ABHD2/LRP6/EDNRA/TWSG1/EDNRB/EFNA5/BMPR1B/UGCG/CEP120/ATP1B2/INHBA/PLPP3/SMAD5/IGF2/IFT74/SLITRK6/SLC1A3/CHODL/ANGPT1/RELN	37
GO:0048869	cellular developmental process	37/240	0.00232379	COL3A1/COL5A2/APP/NOTCH2/ITGB1/ADAM9/ALCAM/NRP2/EFNB2/B4GALT1/USP9X/ROCK1/MET/SEMA4F/ADGRG6/VPS13B/TGFBR1/ABHD2/LRP6/EDNRA/TWSG1/EDNRB/EFNA5/BMPR1B/UGCG/CEP120/ATP1B2/INHBA/PLPP3/SMAD5/IGF2/IFT74/SLITRK6/SLC1A3/CHODL/ANGPT1/RELN	37
GO:0007166	cell surface receptor signaling pathway	35/240	0.000128004	COL3A1/APP/NOTCH2/COL1A2/COL4A5/ITGB1/ITGAV/IGFBP5/ADAM9/ADAM10/ITGB6/EFNB2/ADAM17/USP9X/WNT5A/MET/ADGRG6/TGFBR1/LRP6/EDNRA/TWSG1/EDNRB/ACVR2A/EFNA5/UGCG/PTPN12/USP15/INSR/INHBA/PLPP3/SMAD5/IFNGR1/IFT74/RAB11FIP2/APH1B	35
GO:0009653	anatomical structure morphogenesis	34/240	4.49613e-06	FN1/COL3A1/COL5A2/APP/ADAMTS1/COL1A2/ITGB1/ADAM9/ALCAM/NRP2/EFNB2/BMPR2/B4GALT1/FRYL/ADAM17/USP9X/ROCK1/MET/VPS13B/TGFBR1/HS2ST1/LRP6/EDNRA/TWSG1/BRWD3/EFNA5/BMPR1B/ARID2/INHBA/PLPP3/IGF2/SLITRK6/SLC1A3/ANGPT1	34
GO:0007155	cell adhesion	33/240	2.83961e-10	FN1/COL3A1/APP/VCAN/DSC2/ITGB1/ITGAV/ADAM9/ALCAM/ADAM10/ITGB6/CDH11/CDH13/EFNB2/B4GALT1/ADAM17/ATP1B1/POSTN/ROCK1/SLC7A11/PCDH18/LAMA4/PAG1/TWSG1/EFNA5/KITLG/PCDHB15/THBS3/ATP1B2/PLPP3/IFT74/DPP4/RELN	33
GO:0048513	animal organ development	30/240	0.000720012	COL3A1/COL5A2/APP/ADAMTS1/COL1A2/ITGB1/ADAM9/ADAM10/BMPR2/ROCK1/SLC7A11/MET/GJA1/VPS13B/PCDH18/TGFBR1/HS2ST1/LRP6/EDNRA/TWSG1/EDNRB/BMPR1B/UGCG/CEP120/ARID2/ATP1B2/INHBA/SMAD5/IGF2/IFT74	30
GO:0010033	response to organic substance	30/240	0.00177013	COL3A1/COL5A2/APP/COL1A2/ITGB1/IGFBP5/ADAM9/ADAM10/ADAM17/ROCK1/UBE4A/SLC7A11/MET/CPEB4/TGFBR1/ABHD2/LRP6/KCNMB1/EDNRA/ITPR2/EDNRB/EFNA5/UGCG/SMAD5/IFNGR1/DNAJC10/RAB11FIP2/SLC1A3/CREBRF/ESR2	30
GO:0016310	phosphorylation	29/240	0.0144197	APP/ADAM9/ADAM10/BMPR2/ADAM17/TRPM7/ROCK1/TGFBR1/SLK/LRP6/EDNRA/TWSG1/PKN2/LATS1/ACVR2A/EFNA5/BMPR1B/TAOK1/PPIP5K2/ATR/USP15/INSR/PLPP3/CACUL1/SMAD5/CCNT1/MAP3K2/CDC42BPA/TTBK2	29
GO:0006468	protein phosphorylation	28/240	0.000356827	APP/ADAM9/ADAM10/BMPR2/ADAM17/TRPM7/ROCK1/TGFBR1/SLK/LRP6/EDNRA/TWSG1/PKN2/LATS1/ACVR2A/EFNA5/BMPR1B/TAOK1/ATR/USP15/INSR/PLPP3/CACUL1/SMAD5/CCNT1/MAP3K2/CDC42BPA/TTBK2	28
GO:0007399	nervous system development	26/240	2.44199e-05	COL3A1/APP/ALCAM/NRP2/EFNB2/USP9X/ROCK1/SLC7A11/SEMA4F/ADGRG6/VPS13B/PCDH18/TGFBR1/EDNRA/TWSG1/EDNRB/EFNA5/UGCG/CEP120/ATP1B2/PLPP3/SLITRK6/SLC1A3/CHODL/RELN/SLIT2	26
GO:0040011	locomotion	25/240	5.87464e-07	COL3A1/APP/ADAMTS1/ITGB1/IGFBP5/ADAM9/ALCAM/ADAM10/NRP2/EFNB2/ADAM17/ROCK1/MET/TGFBR1/ABHD2/LAMA4/EDNRA/PKN2/EDNRB/EFNA5/ARID2/ATP1B2/PLPP3/ACKR4/PDGFRA	25
GO:0031325	positive regulation of cellular metabolic process	25/240	0.0270031	APP/ADAM9/ADAM17/USP9X/ROCK1/ATP7A/MET/TGFBR1/LRP6/TWSG1/MGA/NCOA1/SLF2/EFNA5/ARID2/INHBA/PLPP3/RNF168/CACUL1/SMAD5/CCNT1/GTF2A1/IFT74/ESR2/EIF5A2	25
GO:0051173	positive regulation of nitrogen compound metabolic process	25/240	0.0293984	APP/ADAM9/ADAM17/USP9X/ROCK1/MET/TGFBR1/LRP6/TWSG1/MGA/NCOA1/SLF2/EFNA5/ARID2/INHBA/PLPP3/RNF168/CACUL1/SMAD5/CCNT1/GTF2A1/IFT74/APH1B/ESR2/EIF5A2	25
GO:0009719	response to endogenous stimulus	24/240	5.60437e-05	COL3A1/COL5A2/APP/COL1A2/ITGB1/IGFBP5/ADAM9/ADAM17/USP9X/ROCK1/CPEB4/TGFBR1/ABHD2/EDNRA/TWSG1/ITPR2/ACVR2A/EFNA5/UGCG/PTPN12/USP15/SMAD5/SLC1A3/ESR2	24
GO:0016477	cell migration	23/240	2.09512e-06	COL3A1/APP/ADAMTS1/ITGB1/IGFBP5/ADAM9/ADAM10/EFNB2/B4GALT1/ADAM17/USP9X/ROCK1/MET/TGFBR1/ABHD2/LAMA4/EDNRA/PKN2/EDNRB/ARID2/ATP1B2/PLPP3/RELN	23
GO:0048870	cell motility	23/240	2.13931e-05	COL3A1/APP/ADAMTS1/ITGB1/IGFBP5/ADAM9/ADAM10/EFNB2/B4GALT1/ADAM17/USP9X/ROCK1/MET/TGFBR1/ABHD2/LAMA4/EDNRA/PKN2/EDNRB/ARID2/ATP1B2/PLPP3/RELN	23
GO:0009888	tissue development	23/240	0.00234141	COL3A1/COL5A2/COL1A2/ADAM9/BMPR2/B4GALT1/ADAM17/ROCK1/MET/VPS13B/TGFBR1/HS2ST1/LRP6/EDNRA/TWSG1/EDNRB/BMPR1B/UGCG/ARID2/TGFB2/INHBA/SMAD5/IFT74	23
GO:0048468	cell development	23/240	0.0160327	APP/ALCAM/NRP2/EFNB2/B4GALT1/USP9X/ROCK1/MET/VPS13B/ABHD2/EDNRA/TWSG1/EDNRB/EFNA5/BMPR1B/UGCG/ATP1B2/INHBA/SMAD5/IFT74/SLITRK6/SLC1A3/CHODL	23
GO:0071495	cellular response to endogenous stimulus	22/240	9.24796e-05	COL3A1/COL5A2/APP/COL1A2/IGFBP5/ADAM9/ADAM17/USP9X/ROCK1/CPEB4/TGFBR1/EDNRA/TWSG1/ITPR2/ACVR2A/EFNA5/UGCG/PTPN12/USP15/SMAD5/SLC1A3/ESR2	22
GO:1901700	response to oxygen-containing compound	21/240	0.0017406	COL3A1/COL5A2/APP/COL1A2/IGFBP5/ADAM9/ADAM17/ROCK1/SESN3/MET/CPEB4/TGFBR1/ABHD2/LRP6/KCNMB1/EDNRA/ITPR2/EFNA5/RAB11FIP2/SLC1A3/ESR2	21
GO:0051128	regulation of cellular component organization	21/240	0.03557	APP/ADAM9/ADAM10/EFNB2/ADAM17/ROCK1/SLC7A11/MET/TGFBR1/ARFGEF1/DCBLD2/SLF2/EFNA5/CEP120/ATR/ATP1B2/INHBA/SLITRK6/CHODL/SASS6/EIF5A2	21
GO:0022008	neurogenesis	20/240	4.48149e-05	COL3A1/APP/ALCAM/NRP2/EFNB2/USP9X/ROCK1/ADGRG6/TGFBR1/EDNRA/EDNRB/EFNA5/UGCG/CEP120/ATP1B2/PLPP3/SLITRK6/SLC1A3/CHODL/RELN	20
GO:0071310	cellular response to organic substance	19/240	0.0406883	COL3A1/COL5A2/APP/COL1A2/IGFBP5/ADAM9/ADAM17/ROCK1/CPEB4/LRP6/EDNRA/ITPR2/EFNA5/UGCG/SMAD5/IFNGR1/RAB11FIP2/SLC1A3/ESR2	19
GO:0007167	enzyme-linked receptor protein signaling pathway	18/240	1.53887e-05	COL3A1/COL1A2/COL4A5/IGFBP5/ADAM9/EFNB2/ADAM17/USP9X/MET/TGFBR1/TWSG1/ACVR2A/EFNA5/PTPN12/USP15/INSR/INHBA/SMAD5	18
GO:0040012	regulation of locomotion	18/240	3.34223e-05	COL3A1/APP/ADAMTS1/ITGB1/IGFBP5/ADAM9/ADAM10/EFNB2/ADAM17/ROCK1/MET/TGFBR1/ABHD2/LAMA4/PKN2/ARID2/ATP1B2/PLPP3	18
GO:0044093	positive regulation of molecular function	18/240	0.00465537	APP/ADAM9/ADAM17/ATP1B1/USP9X/STIM1/ROCK1/ATP7A/MET/ARAP2/LRP6/EDNRA/ATP1B2/PLPP3/CACUL1/RAB11FIP2/APH1B/ESR2	18
GO:2000145	regulation of cell motility	17/240	6.71216e-05	COL3A1/APP/ADAMTS1/ITGB1/IGFBP5/ADAM9/ADAM10/ADAM17/ROCK1/MET/TGFBR1/ABHD2/LAMA4/PKN2/ARID2/ATP1B2/PLPP3	17
GO:0048699	generation of neurons	17/240	0.000102741	COL3A1/APP/ALCAM/NRP2/EFNB2/USP9X/ROCK1/TGFBR1/EDNRA/EDNRB/EFNA5/UGCG/ATP1B2/SLITRK6/SLC1A3/CHODL/RELN	17
GO:0055085	transmembrane transport	17/240	0.0111297	ATP1B1/USP9X/SLC2A3/STIM1/LRRC8C/SLC7A11/ATP7A/TMEM168/EDNRA/SLC26A2/EDNRB/ATP1B2/SCN2A/SLC1A3/SLC14A1/SLC26A7/SLC2A12	17
GO:0045935	positive regulation of nucleobase-containing compound metabolic process	17/240	0.0221623	APP/USP9X/ROCK1/MET/TGFBR1/LRP6/MGA/NCOA1/SLF2/ARID2/INHBA/RNF168/SMAD5/CCNT1/GTF2A1/IFT74/ESR2	17
GO:0030334	regulation of cell migration	16/240	0.000134107	COL3A1/APP/ADAMTS1/ITGB1/IGFBP5/ADAM9/ADAM10/ADAM17/ROCK1/MET/TGFBR1/ABHD2/LAMA4/ARID2/ATP1B2/PLPP3	16
GO:0120036	plasma membrane bounded cell projection organization	16/240	0.00241642	APP/ALCAM/NRP2/EFNB2/USP9X/ROCK1/TGFBR1/EDNRA/EFNA5/CEP120/CEP83/ATP1B2/IFT74/SLITRK6/TMEM67/CHODL	16
GO:0048646	anatomical structure formation involved in morphogenesis	16/240	0.00318053	COL3A1/COL5A2/ADAMTS1/ITGB1/ADAM9/NRP2/EFNB2/B4GALT1/ROCK1/VPS13B/TGFBR1/HS2ST1/LRP6/EDNRA/TWSG1/ANGPT1	16
GO:0030030	cell projection organization	16/240	0.00531205	APP/ALCAM/NRP2/EFNB2/USP9X/ROCK1/TGFBR1/EDNRA/EFNA5/CEP120/CEP83/ATP1B2/IFT74/SLITRK6/TMEM67/CHODL	16
GO:1901701	cellular response to oxygen-containing compound	16/240	0.00531205	COL3A1/COL5A2/APP/COL1A2/IGFBP5/ADAM9/ROCK1/MET/CPEB4/LRP6/EDNRA/ITPR2/EFNA5/RAB11FIP2/SLC1A3/ESR2	16
GO:0042127	regulation of cell population proliferation	16/240	0.0404651	APP/ADAMTS1/IGFBP5/ADAM10/EFNB2/B4GALT1/ADAM17/SLC7A11/TGFBR1/TWSG1/BMPR1B/ARID2/INHBA/CACUL1/IGF2/IFT74	16
GO:0030182	neuron differentiation	15/240	0.000515526	APP/ALCAM/NRP2/EFNB2/USP9X/ROCK1/TGFBR1/EDNRA/EDNRB/EFNA5/UGCG/ATP1B2/SLITRK6/SLC1A3/CHODL	15
GO:0072359	circulatory system development	15/240	0.000941688	COL3A1/ADAMTS1/COL1A2/ADAM10/NRP2/EFNB2/B4GALT1/ROCK1/GJA1/TGFBR1/EDNRA/ARID2/PLPP3/IFT74/ANGPT1	15
GO:0035295	tube development	15/240	0.0016348	COL3A1/ADAMTS1/NRP2/EFNB2/B4GALT1/ROCK1/SLC7A11/MET/TGFBR1/HS2ST1/EDNRA/EDNRB/ARID2/SMAD5/ANGPT1	15
GO:0048666	neuron development	14/240	0.000118704	APP/ALCAM/NRP2/EFNB2/USP9X/ROCK1/EDNRA/EDNRB/EFNA5/UGCG/ATP1B2/SLITRK6/SLC1A3/CHODL	14
GO:0098609	cell-cell adhesion	14/240	0.000684523	DSC2/ADAM9/ALCAM/CDH11/CDH13/ROCK1/SLC7A11/PCDH18/PAG1/TWSG1/EFNA5/PCDHB15/ATP1B2/PLPP3	14
GO:0009790	embryo development	14/240	0.0064144	COL3A1/COL5A2/ADAM10/TGFBR1/HS2ST1/LPAR6/LRP6/LAMA4/EDNRA/TWSG1/ARID2/TGFB2/PLPP3/IGF2	14
GO:0007017	microtubule-based process	14/240	0.0204612	APP/ROCK1/KIF20B/KTN1/MET/SMC3/KIF5B/DYNC2H1/EFNA5/CEP120/HOOK1/IFT74/KIF27/SASS6	14
GO:0000902	cell morphogenesis	13/240	0.000102762	FN1/APP/ALCAM/NRP2/FRYL/USP9X/ROCK1/MET/EDNRA/BRWD3/EFNA5/SLITRK6/SLC1A3	13
GO:0001944	vasculature development	13/240	0.00117358	COL3A1/ADAMTS1/COL1A2/ADAM10/NRP2/EFNB2/B4GALT1/ROCK1/TGFBR1/EDNRA/ARID2/PLPP3/ANGPT1	13
GO:0010243	response to organonitrogen compound	13/240	0.00872064	COL3A1/COL5A2/APP/COL1A2/ITGB1/IGFBP5/ROCK1/UBE4A/CPEB4/EDNRA/ITPR2/DNAJC10/SLC1A3	13
GO:1901698	response to nitrogen compound	13/240	0.0167091	COL3A1/COL5A2/APP/COL1A2/ITGB1/IGFBP5/ROCK1/UBE4A/CPEB4/EDNRA/ITPR2/DNAJC10/SLC1A3	13
GO:0070848	response to growth factor	12/240	0.000577253	COL3A1/COL1A2/ADAM9/ADAM17/USP9X/ROCK1/TGFBR1/TWSG1/ACVR2A/PTPN12/USP15/SMAD5	12
GO:0006935	chemotaxis	12/240	0.000672101	APP/ALCAM/ADAM10/NRP2/EFNB2/ADAM17/MET/EDNRA/EDNRB/EFNA5/ACKR4/PDGFRA	12
GO:0042330	taxis	12/240	0.000779682	APP/ALCAM/ADAM10/NRP2/EFNB2/ADAM17/MET/EDNRA/EDNRB/EFNA5/ACKR4/PDGFRA	12
GO:0001568	blood vessel development	12/240	0.00177177	COL3A1/ADAMTS1/COL1A2/NRP2/EFNB2/B4GALT1/ROCK1/TGFBR1/EDNRA/ARID2/PLPP3/ANGPT1	12
GO:0035239	tube morphogenesis	12/240	0.00616193	COL3A1/ADAMTS1/NRP2/EFNB2/B4GALT1/ROCK1/MET/TGFBR1/HS2ST1/EDNRA/ARID2/ANGPT1	12
GO:0030001	metal ion transport	12/240	0.00680643	ATP1A1/TFRC/SLC12A2/ATP1B1/STIM1/ATP7A/TMEM168/EDNRA/EDNRB/ATP1B2/SLC1A3/SLC24A5	12
GO:0009887	animal organ morphogenesis	12/240	0.00825455	COL3A1/COL5A2/ADAMTS1/COL1A2/BMPR2/TGFBR1/HS2ST1/EDNRA/TWSG1/BMPR1B/ARID2/INHBA	12
GO:0006812	monoatomic cation transport	12/240	0.0140781	ATP1A1/TFRC/SLC12A2/ATP1B1/STIM1/ATP7A/TMEM168/EDNRA/EDNRB/ATP1B2/SLC1A3/SLC24A5	12
GO:0000278	mitotic cell cycle	12/240	0.0261722	APP/ADAMTS1/ADAM17/SMC3/PDS5A/EDNRA/PKN2/SLF2/PDS5B/INHBA/CACUL1/SASS6	12
GO:0007178	transmembrane receptor protein serine/threonine kinase signaling pathway	11/240	4.41418e-05	COL3A1/COL1A2/ADAM9/ADAM17/USP9X/TGFBR1/TWSG1/ACVR2A/USP15/INHBA/SMAD5	11
GO:0031175	neuron projection development	11/240	0.000524109	APP/ALCAM/NRP2/EFNB2/USP9X/ROCK1/EDNRA/EFNA5/ATP1B2/SLITRK6/CHODL	11
GO:0071363	cellular response to growth factor stimulus	11/240	0.00156058	COL3A1/COL1A2/ADAM9/ADAM17/USP9X/TGFBR1/TWSG1/ACVR2A/PTPN12/USP15/SMAD5	11
GO:0051130	positive regulation of cellular component organization	11/240	0.0208105	APP/ADAM9/ROCK1/MET/TGFBR1/SLF2/EFNA5/CEP120/ATP1B2/SASS6/EIF5A2	11
GO:0040007	growth	11/240	0.0284394	COL3A1/APP/ADAM10/ADAM17/USP9X/TGFBR1/DCBLD2/EDNRA/EFNA5/ARID2/INHBA	11
GO:0030198	extracellular matrix organization	10/240	1.1213e-06	COL3A1/COL5A2/APP/ADAMTS1/COL1A2/B4GALT1/ADAMTS20/ADAMTSL1/TGFBR1/ADAMTS6	10
GO:0043062	extracellular structure organization	10/240	1.1213e-06	COL3A1/COL5A2/APP/ADAMTS1/COL1A2/B4GALT1/ADAMTS20/ADAMTSL1/TGFBR1/ADAMTS6	10
GO:0045229	external encapsulating structure organization	10/240	1.1213e-06	COL3A1/COL5A2/APP/ADAMTS1/COL1A2/B4GALT1/ADAMTS20/ADAMTSL1/TGFBR1/ADAMTS6	10
GO:0071559	response to transforming growth factor beta	10/240	2.29962e-05	COL3A1/COL1A2/ADAM9/ADAM17/USP9X/ROCK1/TGFBR1/TWSG1/USP15/SMAD5	10
GO:0000904	cell morphogenesis involved in differentiation	10/240	7.15838e-05	APP/ALCAM/NRP2/USP9X/ROCK1/MET/EDNRA/EFNA5/SLITRK6/SLC1A3	10
GO:0001667	ameboidal-type cell migration	10/240	0.000357813	ADAM9/EFNB2/ADAM17/ROCK1/MET/TGFBR1/EDNRA/PKN2/EDNRB/PLPP3	10
GO:0030335	positive regulation of cell migration	10/240	0.00460189	APP/ADAMTS1/ITGB1/IGFBP5/ADAM9/ADAM10/ADAM17/MET/TGFBR1/PLPP3	10
GO:0007417	central nervous system development	10/240	0.00521016	COL3A1/APP/SLC7A11/VPS13B/PCDH18/TWSG1/CEP120/ATP1B2/PLPP3/RELN	10
GO:0009101	glycoprotein biosynthetic process	10/240	0.00521016	BMPR2/B4GALT1/GALNT1/B3GNT7/FUT8/HS2ST1/ARFGEF1/GALNT8/BMPR1B/ALG8	10
GO:0071417	cellular response to organonitrogen compound	10/240	0.00521016	COL3A1/COL5A2/APP/COL1A2/IGFBP5/ROCK1/CPEB4/EDNRA/ITPR2/SLC1A3	10
GO:0009611	response to wounding	10/240	0.00587975	COL3A1/B4GALT1/ADAM17/SLC7A11/ARFGEF1/ABHD2/DCBLD2/EDNRA/PLPP3/SLC1A3	10
GO:2000147	positive regulation of cell motility	10/240	0.00587975	APP/ADAMTS1/ITGB1/IGFBP5/ADAM9/ADAM10/ADAM17/MET/TGFBR1/PLPP3	10
GO:0040017	positive regulation of locomotion	10/240	0.00661471	APP/ADAMTS1/ITGB1/IGFBP5/ADAM9/ADAM10/ADAM17/MET/TGFBR1/PLPP3	10
GO:0048514	blood vessel morphogenesis	10/240	0.00661471	COL3A1/ADAMTS1/NRP2/EFNB2/B4GALT1/ROCK1/TGFBR1/EDNRA/ARID2/ANGPT1	10
GO:1901699	cellular response to nitrogen compound	10/240	0.00829728	COL3A1/COL5A2/APP/COL1A2/IGFBP5/ROCK1/CPEB4/EDNRA/ITPR2/SLC1A3	10
GO:0009100	glycoprotein metabolic process	10/240	0.0102916	BMPR2/B4GALT1/GALNT1/B3GNT7/FUT8/HS2ST1/ARFGEF1/GALNT8/BMPR1B/ALG8	10
GO:0098660	inorganic ion transmembrane transport	10/240	0.0102916	ATP1B1/STIM1/ATP7A/TMEM168/EDNRA/SLC26A2/EDNRB/ATP1B2/SLC1A3/SLC26A7	10
GO:0014070	response to organic cyclic compound	10/240	0.0307133	IGFBP5/SLC7A11/TGFBR1/ABHD2/LRP6/ITPR2/EFNA5/SMAD5/SLC1A3/ESR2	10
GO:0055082	intracellular chemical homeostasis	10/240	0.0332023	APP/TFRC/ATP1B1/SLC7A11/ATP7A/EDNRA/EFNA5/ATP1B2/RAB11FIP2/SLC1A3	10
GO:0007179	transforming growth factor beta receptor signaling pathway	9/240	3.34786e-05	COL3A1/COL1A2/ADAM9/ADAM17/USP9X/TGFBR1/TWSG1/USP15/SMAD5	9
GO:0043588	skin development	9/240	8.57425e-05	COL3A1/COL5A2/COL1A2/ADAM9/ROCK1/MET/UGCG/INHBA/IFT74	9
GO:0071560	cellular response to transforming growth factor beta stimulus	9/240	0.000113958	COL3A1/COL1A2/ADAM9/ADAM17/USP9X/TGFBR1/TWSG1/USP15/SMAD5	9
GO:0016049	cell growth	9/240	0.000495501	APP/ADAM10/ADAM17/USP9X/TGFBR1/DCBLD2/EDNRA/EFNA5/INHBA	9
GO:0032989	cellular component morphogenesis	9/240	0.000495501	APP/ALCAM/NRP2/USP9X/ROCK1/VPS13B/EDNRA/EFNA5/SLITRK6	9
GO:0045787	positive regulation of cell cycle	9/240	0.000612548	APP/ADAMTS1/ADAM17/LRP6/PKN2/SLF2/CEP120/CSPP1/SASS6	9
GO:0034330	cell junction organization	9/240	0.00698341	APP/COL4A5/ADAM10/ROCK1/SLC7A11/TGFBR1/PKN2/EFNA5/SLITRK6	9
GO:0001501	skeletal system development	9/240	0.0172573	COL3A1/COL5A2/COL1A2/BMPR2/TGFBR1/EDNRA/TWSG1/BMPR1B/SMAD5	9
GO:0008285	negative regulation of cell population proliferation	9/240	0.0230849	APP/IGFBP5/B4GALT1/TGFBR1/TWSG1/BMPR1B/ARID2/INHBA/IFT74	9
GO:0030155	regulation of cell adhesion	9/240	0.0253079	ADAM9/ADAM10/ROCK1/LAMA4/PAG1/TWSG1/EFNA5/PLPP3/IFT74	9
GO:0048667	cell morphogenesis involved in neuron differentiation	8/240	0.000176402	APP/ALCAM/NRP2/USP9X/EDNRA/EFNA5/SLITRK6/SLC1A3	8
GO:0032990	cell part morphogenesis	8/240	0.00023658	APP/ALCAM/NRP2/USP9X/ROCK1/EDNRA/EFNA5/SLITRK6	8
GO:0048812	neuron projection morphogenesis	8/240	0.00023658	APP/ALCAM/NRP2/USP9X/ROCK1/EDNRA/EFNA5/SLITRK6	8
GO:0048858	cell projection morphogenesis	8/240	0.00023658	APP/ALCAM/NRP2/USP9X/ROCK1/EDNRA/EFNA5/SLITRK6	8
GO:0120039	plasma membrane bounded cell projection morphogenesis	8/240	0.00023658	APP/ALCAM/NRP2/USP9X/ROCK1/EDNRA/EFNA5/SLITRK6	8
GO:0090068	positive regulation of cell cycle process	8/240	0.000839746	APP/ADAMTS1/ADAM17/PKN2/SLF2/CEP120/CSPP1/SASS6	8
GO:0010631	epithelial cell migration	8/240	0.00158092	ADAM9/EFNB2/ADAM17/ROCK1/MET/TGFBR1/PKN2/PLPP3	8
GO:0090132	epithelium migration	8/240	0.00158092	ADAM9/EFNB2/ADAM17/ROCK1/MET/TGFBR1/PKN2/PLPP3	8
GO:0090130	tissue migration	8/240	0.00276487	ADAM9/EFNB2/ADAM17/ROCK1/MET/TGFBR1/PKN2/PLPP3	8
GO:0060322	head development	8/240	0.00710801	COL3A1/APP/SLC7A11/PCDH18/EDNRA/TWSG1/CEP120/ATP1B2	8
GO:0007169	transmembrane receptor protein tyrosine kinase signaling pathway	8/240	0.021312	COL4A5/IGFBP5/EFNB2/ADAM17/MET/EFNA5/PTPN12/INSR	8
GO:0001525	angiogenesis	8/240	0.0261469	ADAMTS1/NRP2/EFNB2/B4GALT1/ROCK1/TGFBR1/EDNRA/ANGPT1	8
GO:0098655	monoatomic cation transmembrane transport	8/240	0.0489728	ATP1B1/STIM1/ATP7A/TMEM168/EDNRA/EDNRB/ATP1B2/SLC1A3	8
GO:0098662	inorganic cation transmembrane transport	8/240	0.0489728	ATP1B1/STIM1/ATP7A/TMEM168/EDNRA/EDNRB/ATP1B2/SLC1A3	8
GO:0098771	inorganic ion homeostasis	8/240	0.0489728	APP/TFRC/ATP1B1/ATP7A/EDNRA/EDNRB/ATP1B2/SLC1A3	8
GO:0006814	sodium ion transport	7/240	0.000260764	ATP1A1/SLC12A2/ATP1B1/TMEM168/EDNRA/EDNRB/ATP1B2	7
GO:0007409	axonogenesis	7/240	0.000260764	APP/ALCAM/NRP2/USP9X/EDNRA/EFNA5/SLITRK6	7
GO:0061564	axon development	7/240	0.000490413	APP/ALCAM/NRP2/USP9X/EDNRA/EFNA5/SLITRK6	7
GO:0098742	cell-cell adhesion via plasma-membrane adhesion molecules	7/240	0.000857942	DSC2/ALCAM/CDH11/CDH13/PCDH18/EFNA5/PCDHB15	7
GO:0061448	connective tissue development	7/240	0.00221891	COL3A1/BMPR2/VPS13B/TGFBR1/TWSG1/BMPR1B/SMAD5	7
GO:0050808	synapse organization	7/240	0.00273463	APP/COL4A5/ADAM10/ROCK1/SLC7A11/EFNA5/SLITRK6	7
GO:0007507	heart development	7/240	0.0048422	COL3A1/ADAMTS1/GJA1/TGFBR1/EDNRA/ARID2/IFT74	7
GO:0007420	brain development	7/240	0.0124334	COL3A1/APP/SLC7A11/PCDH18/TWSG1/CEP120/ATP1B2	7
GO:0044089	positive regulation of cellular component biogenesis	7/240	0.0124334	ROCK1/MET/TGFBR1/SLF2/EFNA5/CEP120/SASS6	7
GO:0008015	blood circulation	7/240	0.0325136	COL1A2/ATP1B1/ROCK1/EDNRA/PTGS2/EDNRB/SMAD5	7
GO:0003013	circulatory system process	7/240	0.0360074	COL1A2/ATP1B1/ROCK1/EDNRA/PTGS2/EDNRB/SMAD5	7
GO:0006486	protein glycosylation	7/240	0.0437197	B4GALT1/GALNT1/B3GNT7/FUT8/ARFGEF1/GALNT8/ALG8	7
GO:0006979	response to oxidative stress	7/240	0.0437197	APP/ADAM9/SESN3/SLC7A11/MET/EDNRA/PTGS2	7
GO:0043413	macromolecule glycosylation	7/240	0.0437197	B4GALT1/GALNT1/B3GNT7/FUT8/ARFGEF1/GALNT8/ALG8	7
GO:0042060	wound healing	7/240	0.047947	COL3A1/B4GALT1/ADAM17/SLC7A11/ARFGEF1/DCBLD2/PLPP3	7
GO:0051052	regulation of DNA metabolic process	7/240	0.047947	USP9X/SMC3/PDS5A/SLF2/ARID2/RNF168/OBI1	7
GO:0051493	regulation of cytoskeleton organization	7/240	0.047947	ROCK1/MET/TGFBR1/ARFGEF1/EFNA5/CEP120/SASS6	7
GO:0070085	glycosylation	7/240	0.047947	B4GALT1/GALNT1/B3GNT7/FUT8/ARFGEF1/GALNT8/ALG8	7
GO:0033627	cell adhesion mediated by integrin	6/240	1.30288e-05	ITGB1/ADAM9/ITGB6/ADAM17/PLPP3/IFT74	6
GO:0050803	regulation of synapse structure or activity	6/240	0.00136943	APP/ADAM10/ROCK1/SLC7A11/EFNA5/SLITRK6	6
GO:0050807	regulation of synapse organization	6/240	0.00136943	APP/ADAM10/ROCK1/SLC7A11/EFNA5/SLITRK6	6
GO:0002064	epithelial cell development	6/240	0.0018129	B4GALT1/ROCK1/MET/EDNRA/EDNRB/IFT74	6
GO:0030900	forebrain development	6/240	0.0018129	COL3A1/APP/SLC7A11/TWSG1/CEP120/ATP1B2	6
GO:0051216	cartilage development	6/240	0.0038036	COL3A1/BMPR2/TGFBR1/TWSG1/BMPR1B/SMAD5	6
GO:0001822	kidney development	6/240	0.00708033	ADAMTS1/TGFBR1/HS2ST1/EDNRA/EDNRB/SMAD5	6
GO:0072001	renal system development	6/240	0.00852542	ADAMTS1/TGFBR1/HS2ST1/EDNRA/EDNRB/SMAD5	6
GO:0001558	regulation of cell growth	6/240	0.0101706	ADAM10/ADAM17/TGFBR1/DCBLD2/EFNA5/INHBA	6
GO:0031344	regulation of cell projection organization	6/240	0.0141157	EFNB2/TGFBR1/EFNA5/CEP120/ATP1B2/CHODL	6
GO:0043087	regulation of GTPase activity	6/240	0.0141157	MET/ARAP2/ARFGEF1/EFNA5/RAB11FIP2/IQGAP2	6
GO:0120035	regulation of plasma membrane bounded cell projection organization	6/240	0.0141157	EFNB2/TGFBR1/EFNA5/CEP120/ATP1B2/CHODL	6
GO:0008544	epidermis development	6/240	0.0190191	ADAM9/ROCK1/MET/UGCG/INHBA/IFT74	6
GO:0022412	cellular process involved in reproduction in multicellular organism	6/240	0.0360476	VPS13B/TGFBR1/ABHD2/EDNRA/INHBA/SMAD5	6
GO:0001701	in utero embryonic development	6/240	0.0449456	COL3A1/ADAM10/TGFBR1/LPAR6/EDNRA/IGF2	6
GO:0050900	leukocyte migration	6/240	0.0498657	APP/ADAM10/B4GALT1/ADAM17/ROCK1/EDNRB	6
GO:0007411	axon guidance	5/240	0.000399084	APP/ALCAM/NRP2/EDNRA/EFNA5	5
GO:0097485	neuron projection guidance	5/240	0.000399084	APP/ALCAM/NRP2/EDNRA/EFNA5	5
GO:0030509	BMP signaling pathway	5/240	0.000996151	USP9X/TWSG1/ACVR2A/USP15/SMAD5	5
GO:0071772	response to BMP	5/240	0.000996151	USP9X/TWSG1/ACVR2A/USP15/SMAD5	5
GO:0071773	cellular response to BMP stimulus	5/240	0.000996151	USP9X/TWSG1/ACVR2A/USP15/SMAD5	5
GO:0007156	homophilic cell adhesion via plasma membrane adhesion molecules	5/240	0.001467	DSC2/CDH11/CDH13/PCDH18/PCDHB15	5
GO:0007266	Rho protein signal transduction	5/240	0.001467	COL3A1/COL1A2/ROCK1/ARHGEF12/MET	5
GO:0031589	cell-substrate adhesion	5/240	0.00286947	COL3A1/ADAM9/ROCK1/EFNA5/ATP1B2	5
GO:0045931	positive regulation of mitotic cell cycle	5/240	0.00504791	APP/ADAMTS1/ADAM17/PKN2/SASS6	5
GO:0007229	integrin-mediated signaling pathway	5/240	0.0101895	COL3A1/ITGB1/ITGAV/ITGB6/PLPP3	5
GO:0048762	mesenchymal cell differentiation	5/240	0.0101895	ROCK1/TGFBR1/LRP6/EDNRA/EDNRB	5
GO:0043542	endothelial cell migration	5/240	0.0124931	EFNB2/ADAM17/MET/TGFBR1/PLPP3	5
GO:0042063	gliogenesis	5/240	0.0151256	COL3A1/APP/ADGRG6/ATP1B2/PLPP3	5
GO:0007219	Notch signaling pathway	5/240	0.018105	APP/NOTCH2/ADAM10/IFT74/APH1B	5
GO:0032886	regulation of microtubule-based process	5/240	0.018105	ROCK1/MET/EFNA5/CEP120/SASS6	5
GO:0000082	G1/S transition of mitotic cell cycle	5/240	0.0214478	ADAMTS1/ADAM17/INHBA/CACUL1/SASS6	5
GO:0060485	mesenchyme development	5/240	0.0214478	ROCK1/TGFBR1/LRP6/EDNRA/EDNRB	5
GO:1902074	response to salt	5/240	0.0214478	ADAM9/KCNMB1/EDNRA/EDNRB/SLC1A3	5
GO:0030336	negative regulation of cell migration	5/240	0.0292794	COL3A1/IGFBP5/ABHD2/ARID2/ATP1B2	5
GO:0044843	cell cycle G1/S phase transition	5/240	0.0292794	ADAMTS1/ADAM17/INHBA/CACUL1/SASS6	5
GO:0040013	negative regulation of locomotion	5/240	0.0337911	COL3A1/IGFBP5/ABHD2/ARID2/ATP1B2	5
GO:2000146	negative regulation of cell motility	5/240	0.0337911	COL3A1/IGFBP5/ABHD2/ARID2/ATP1B2	5
GO:1990778	protein localization to cell periphery	5/240	0.038712	ITGB1/ADAM10/ATP1B1/ROCK1/LRP6	5
GO:0021700	developmental maturation	5/240	0.0440485	APP/ROCK1/ABHD2/EDNRA/EDNRB	5
GO:0034329	cell junction assembly	5/240	0.0440485	APP/ROCK1/PKN2/EFNA5/SLITRK6	5
GO:0014812	muscle cell migration	4/240	0.00282868	ADAMTS1/IGFBP5/ROCK1/ABHD2	4
GO:0021537	telencephalon development	4/240	0.00282868	COL3A1/SLC7A11/CEP120/ATP1B2	4
GO:0045446	endothelial cell differentiation	4/240	0.00421702	ROCK1/MET/EDNRA/EDNRB	4
GO:0097305	response to alcohol	4/240	0.00421702	TGFBR1/LRP6/ITPR2/EFNA5	4
GO:0098657	import into cell	4/240	0.00421702	ATP1B1/SLC7A11/ATP1B2/SLC1A3	4
GO:0002028	regulation of sodium ion transport	4/240	0.00600174	ATP1A1/ATP1B1/TMEM168/ATP1B2	4
GO:0048588	developmental cell growth	4/240	0.00822644	APP/USP9X/EDNRA/EFNA5	4
GO:0001837	epithelial to mesenchymal transition	4/240	0.0109302	ROCK1/TGFBR1/LRP6/EDNRA	4
GO:0007160	cell-matrix adhesion	4/240	0.0109302	COL3A1/ADAM9/ROCK1/EFNA5	4
GO:0008217	regulation of blood pressure	4/240	0.0109302	COL1A2/EDNRA/PTGS2/EDNRB	4
GO:0008643	carbohydrate transport	4/240	0.0109302	SLC2A3/EDNRA/SLC35A5/SLC2A12	4
GO:0030307	positive regulation of cell growth	4/240	0.0109302	ADAM10/ADAM17/TGFBR1/EFNA5	4
GO:0032414	positive regulation of ion transmembrane transporter activity	4/240	0.0109302	ATP1B1/STIM1/EDNRA/ATP1B2	4
GO:0032963	collagen metabolic process	4/240	0.0109302	COL1A2/ITGB1/MMP2/P3H2	4
GO:0003158	endothelium development	4/240	0.0141472	ROCK1/MET/EDNRA/EDNRB	4
GO:0030216	keratinocyte differentiation	4/240	0.0141472	ADAM9/ROCK1/UGCG/IFT74	4
GO:0031346	positive regulation of cell projection organization	4/240	0.0141472	TGFBR1/EFNA5/CEP120/ATP1B2	4
GO:0051781	positive regulation of cell division	4/240	0.0141472	PKN2/TGFB2/IGF2/CSPP1	4
GO:0032411	positive regulation of transporter activity	4/240	0.0179065	ATP1B1/STIM1/EDNRA/ATP1B2	4
GO:0060560	developmental growth involved in morphogenesis	4/240	0.0179065	APP/USP9X/EDNRA/EFNA5	4
GO:0072073	kidney epithelium development	4/240	0.0179065	HS2ST1/EDNRA/EDNRB/SMAD5	4
GO:1901992	positive regulation of mitotic cell cycle phase transition	4/240	0.0179065	APP/ADAMTS1/ADAM17/SASS6	4
GO:0003007	heart morphogenesis	4/240	0.0222317	ADAMTS1/TGFBR1/EDNRA/ARID2	4
GO:0007162	negative regulation of cell adhesion	4/240	0.0222317	ADAM10/PAG1/TWSG1/EFNA5	4
GO:0043393	regulation of protein binding	4/240	0.0271414	APP/USP9X/ROCK1/TGFBR1	4
GO:0030203	glycosaminoglycan metabolic process	4/240	0.0326488	GNS/HS2ST1/EDNRA/EDNRB	4
GO:1904064	positive regulation of cation transmembrane transport	4/240	0.0326488	ATP1B1/STIM1/EDNRA/ATP1B2	4
GO:0000070	mitotic sister chromatid segregation	4/240	0.0387622	SMC3/PDS5A/SLF2/PDS5B	4
GO:0034767	positive regulation of monoatomic ion transmembrane transport	4/240	0.0387622	ATP1B1/STIM1/EDNRA/ATP1B2	4
GO:0045216	cell-cell junction organization	4/240	0.0387622	ADAM10/ROCK1/TGFBR1/PKN2	4
GO:0050821	protein stabilization	4/240	0.0387622	ATP1B1/USP9X/ATP1B2/PLPP3	4
GO:0051495	positive regulation of cytoskeleton organization	4/240	0.0387622	MET/TGFBR1/CEP120/SASS6	4
GO:1901888	regulation of cell junction assembly	4/240	0.0387622	APP/ROCK1/EFNA5/SLITRK6	4
GO:1901989	positive regulation of cell cycle phase transition	4/240	0.0387622	APP/ADAMTS1/ADAM17/SASS6	4
GO:0006022	aminoglycan metabolic process	4/240	0.0454852	GNS/HS2ST1/EDNRA/EDNRB	4
GO:0010975	regulation of neuron projection development	4/240	0.0454852	EFNB2/EFNA5/ATP1B2/CHODL	4
GO:0048469	cell maturation	4/240	0.0454852	APP/ABHD2/EDNRA/EDNRB	4
GO:0072659	protein localization to plasma membrane	4/240	0.0454852	ITGB1/ATP1B1/ROCK1/LRP6	4
GO:2000045	regulation of G1/S transition of mitotic cell cycle	4/240	0.0454852	ADAMTS1/ADAM17/INHBA/SASS6	4
GO:0008645	hexose transmembrane transport	3/240	0.0240755	SLC2A3/EDNRA/SLC2A12	3
GO:0015698	inorganic anion transport	3/240	0.0240755	SLC26A2/SLC1A3/SLC26A7	3
GO:0015749	monosaccharide transmembrane transport	3/240	0.0240755	SLC2A3/EDNRA/SLC2A12	3
GO:1902305	regulation of sodium ion transmembrane transport	3/240	0.0240755	ATP1B1/TMEM168/ATP1B2	3
GO:1904659	glucose transmembrane transport	3/240	0.0240755	SLC2A3/EDNRA/SLC2A12	3
GO:0003205	cardiac chamber development	3/240	0.0315225	ADAMTS1/TGFBR1/EDNRA	3
GO:0033619	membrane protein proteolysis	3/240	0.0315225	ADAM9/ADAM10/ADAM17	3
GO:0034219	carbohydrate transmembrane transport	3/240	0.0315225	SLC2A3/EDNRA/SLC2A12	3
GO:0035725	sodium ion transmembrane transport	3/240	0.0315225	ATP1B1/TMEM168/ATP1B2	3
GO:0048644	muscle organ morphogenesis	3/240	0.0315225	COL3A1/TGFBR1/EDNRA	3
GO:0051963	regulation of synapse assembly	3/240	0.0315225	APP/EFNA5/SLITRK6	3
GO:0071805	potassium ion transmembrane transport	3/240	0.0400294	ATP1B1/ATP1B2/SLC1A3	3
GO:0072676	lymphocyte migration	3/240	0.0400294	APP/ADAM10/ADAM17	3
GO:1900087	positive regulation of G1/S transition of mitotic cell cycle	3/240	0.0400294	ADAMTS1/ADAM17/SASS6	3
GO:0006275	regulation of DNA replication	3/240	0.0495703	SMC3/PDS5A/OBI1	3
GO:0006636	unsaturated fatty acid biosynthetic process	3/240	0.0495703	PTGS2/PNPLA8/ELOVL7	3
GO:0007416	synapse assembly	3/240	0.0495703	APP/EFNA5/SLITRK6	3
GO:0010595	positive regulation of endothelial cell migration	3/240	0.0495703	ADAM17/MET/PLPP3	3
GO:0034637	cellular carbohydrate biosynthetic process	3/240	0.0495703	B4GALT1/HS2ST1/AGL	3
GO:0071677	positive regulation of mononuclear cell migration	3/240	0.0495703	APP/ADAM10/ADAM17	3
GO:1902808	positive regulation of cell cycle G1/S phase transition	3/240	0.0495703	ADAMTS1/ADAM17/SASS6	3
